# Supplementary material for: Effect of regio- and stereoisomerism on antifouling 2,5-diketopiperazines
Source: Royal Society of Chemistry journal article supplement (doi:10.1039/d2ob01864k), 2022-01-01
Supplement: d2ob01864k1.pdf [file d2ob01864k1.pdf]

## Supplementary Information

# Effect of regio- and stereoisomerism on antifouling 2,5-diketopiperazines

Thomas M. Grant<sup>a</sup>, David Rennison<sup>a,\*</sup>, John Arabshahi<sup>a</sup>, Margaret A. Brimble<sup>a</sup>, Patrick Cahill<sup>b</sup>, Johan Svenson<sup>b,\*</sup>.

<sup>a</sup> *School of Chemical Sciences, University of Auckland, 23 Symonds Street, Auckland, New Zealand.*

<sup>b</sup> *Cawthron Research Institute, 98 Halifax Street, Nelson, New Zealand.*

**Keywords** Diketopiperazine, Antifouling, Marine, Non-toxic, Broad-spectrum, Synthesis

\*Correspondence and requests for materials should be addressed to D.R: [d.rennison@auckland.ac.nz](mailto:d.rennison@auckland.ac.nz) orchid: 0000-0002-8002-2554 or J.S: [johan.svenson@cawthron.org.nz](mailto:johan.svenson@cawthron.org.nz) orchid: 0000-0002-4729-9359.

### **List of supporting information.**

|                                                                       |                |
|-----------------------------------------------------------------------|----------------|
| List of strains of fouling organisms used.                            | <b>S3</b>      |
| Chemical synthesis and NMR of compounds <b>14-30</b> .                | <b>S4-S14</b>  |
| $^1\text{H}$ , $^{13}\text{C}$ NMR spectra of compounds <b>2-30</b> . | <b>S15-S34</b> |
| Analytical RP-chromatograms of DKPs <b>2-10</b>                       | <b>S35-S36</b> |

**Table 1.** Macrofouling organisms used to assess antifouling potency. Key assay parameters are listed.

| Scientific Name                  | Common Name            | Assay format (volume)  | Test organisms         | Test concs .                                   |
|----------------------------------|------------------------|------------------------|------------------------|------------------------------------------------|
| <i>Ciona savignyi</i>            | Transparent sea squirt | 12-well plate (7.1 mL) | 3 ± 1 larvae/mL        | 0, 0.05, 0.1, 0.5,<br>1, 2, 5, 10, 20<br>µg/mL |
| <i>Mytilus galloprovincialis</i> | Blue mussel            | 12-well plate (5 mL)   | 5 ± 1 larvae/mL        |                                                |
| <i>Spirobranchus cariniferus</i> | Blue tube worm         | 12-well plate (5 mL)   | 5 ± 1 larvae/mL        |                                                |
| <i>Undaria pinnatifida</i>       | Asian kelp             | 24-well plate (2 mL)   | 200 ± 5 gametophyte/mL |                                                |

### General Experimental Methods

Retention times and retention factors were recorded on a dionex ultimate 3000 HPLC with a VWD set to 210 nm, 220 nm, 254 nm, and 280 nm and a Phenomenex Gemini C18-Si column (150 mm × 4.6 mm, 5 µm) with an eluent system of either A) a gradient of 100:0 A:B to 0:100 A:B over 10 min at 1 mL/min; where solvent A was water (+0.1% v/v trifluoroacetic acid) and solvent B was acetonitrile (+0.1% v/v trifluoroacetic acid); or B) isocratic system of 26:74 A:B over 90 min at 1 mL/min; where solvent A was water (+0.1% v/v trifluoroacetic acid) and solvent B was acetonitrile (+0.1% v/v trifluoroacetic acid), unless stated otherwise.

### ***N*-Bip-L-Orn(Z)-OMe (14)**

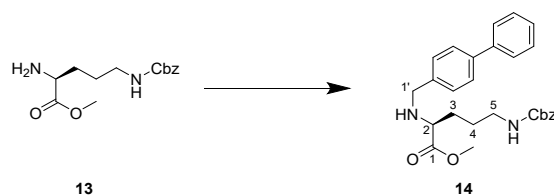

A solution of L-Orn(Z)-OMe.HCl **13** (1.0 g, 3.57 mmol), DIPEA (1.24 mL, 7.13 mmol) and 4-phenylbenzaldehyde (0.65 g, 3.57 mmol) in THF (50 mL) was stirred at rt for 1 h. To this mixture was then added NaBH<sub>3</sub>CN (0.67 g, 10.7 mmol), MeOH (5 mL), and AcOH (2.5 mL), and the mixture stirred at rt for a further 4 h. The mixture was then concentrated *in vacuo* and the resulting residue resuspended in EtOAc (20 mL). The organic layer was then washed with NaOH (1 M, 1 × 20 mL), dried over anhydrous MgSO<sub>4</sub>, filtered, and concentrated *in vacuo*. Purification *via* flash chromatography (Pet. Ether-EtOAc 1:1) afforded *title compound* **14** (0.72 g, 45%) as a colourless solid. **<sup>1</sup>H NMR** (400 MHz; CDCl<sub>3</sub>): δ 7.60 – 7.30 (m, 14H, H-Ar), 5.15 – 5.10 (m, 3H, H-NH, H-Cbz), 3.86 (ABq, *J* = 72.3, 12.9 Hz 2H, H-1'), 3.74 (s, 3H, H-OCH<sub>3</sub>), 3.32 (t, *J* = 5.8 Hz, 1H, H-2), 3.23 – 3.17 (m, 2H, H-5), 1.76 – 1.60 (m, 4H, H-3, H-4); **<sup>13</sup>C NMR** (100 MHz; CDCl<sub>3</sub>): δ 175.8 (C, C-1), 156.5 (C, C-Cbz), 141.0 (C, C-Ar), 140.2 (C, C-Ar), 138.8 (C, C-Ar), 136.7 (C, C-Ar), 128.83 (2 × CH, C-Ar), 128.82 (2 × CH, C-Ar), 128.6 (2 × CH, C-Ar), 128.2 (2 × CH, C-Ar), 128.16 (CH, C-Ar), 127.3 (CH, C-Ar), 127.2 (2 × CH, C-Ar), 127.1 (2 × CH, C-Ar), 66.7 (CH<sub>2</sub>, C-Cbz), 60.5 (CH, C-2), 52.0 (CH<sub>2</sub>, C-1'), 51.9 (CH<sub>3</sub>, C-OCH<sub>3</sub>), 40.9 (CH<sub>2</sub>, C-5), 30.8 (CH<sub>2</sub>, C-3), 26.5 (CH<sub>2</sub>, C-4); **HRMS** (ESI) *m/z*: [M + H]<sup>+</sup> calcd for C<sub>27</sub>H<sub>31</sub>N<sub>2</sub>O<sub>4</sub>, 447.2278; found, 447.2285.

### *N*-(*N*-phthaloylpropylamine)-*L*-Orn(*Z*)-OMe (**15**)

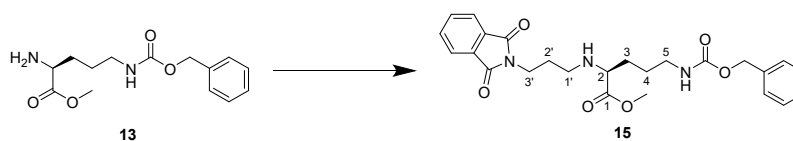

To a solution of *L*-Orn(*Z*)-OMe **15** (0.3 g, 0.83 mmol) and *N*-(3-bromopropyl)phthalimide (0.24 g, 0.91 mmol) in DMF (8 mL) over 4 Å mol sieves (0.3 g) was added dropwise over 12 h TEA (0.12 mL, 0.83 mmol), and the mixture stirred for a further 5 h. The mixture was then poured into H<sub>2</sub>O (20 mL) and extracted with DCM (3 × 5 mL). The combined organic layers were washed with brine (15 mL), dried over anhydrous MgSO<sub>4</sub>, filtered, and then concentrated *in vacuo*. Purification *via* flash chromatography (Pet. Ether-EtOAc 1:1) afforded *title compound* **15** (0.29 g, 73%) as a colourless solid. <sup>1</sup>H NMR (400 MHz; CDCl<sub>3</sub>): δ 7.82 – 7.78 (m, 2H, H-Phth), 7.70 – 7.65 (m, 2H, H-Phth), 7.32 – 7.26 (m, 5H, H-Cbz), 5.45 (br, 1H, H-NH), 5.07 (s, 2H, H-Cbz), 3.78 – 3.70 (m, 2H, H-3'), 3.67 (s, 3H, OCH<sub>3</sub>), 3.21 – 3.18 (m, 3H, H-2, H-5), 2.70 – 2.64 (m, 1H, H<sub>a</sub>-1'), 2.47 – 2.40 (m, 1H, H<sub>b</sub>-1'), 1.83 (p, *J* = 6.9 Hz, 2H, H-2'), 1.70 – 1.52 (m, 4H, H-3, H-4); <sup>13</sup>C NMR (100 MHz; CDCl<sub>3</sub>): δ 175.5 (C, C-1), 168.3 (2 × C, C-Phth), 156.4 (C, C-Cbz), 136.7 (C, C-Cbz), 133.8 (2 × CH, C-Phth), 132.0 (2 × C, C-Phth), 128.3 (2 × CH, C-Cbz), 128.0 (2 × CH, C-Cbz), 127.9 (CH, C-Cbz), 123.1 (2 × CH, C-Phth), 66.3 (CH<sub>2</sub>, C-Cbz), 61.0 (CH, C-2), 51.6 (C-OCH<sub>3</sub>), 45.2 (CH<sub>2</sub>, C-1'), 40.7 (CH<sub>2</sub>, C-5), 35.8 (CH<sub>2</sub>, C-3'), 30.6 (CH<sub>2</sub>, C-3), 28.8 (CH<sub>2</sub>, C-2'), 26.2 (CH<sub>2</sub>, C-4); HRMS (ESI) *m/z*: [M + H]<sup>+</sup> calcd for C<sub>25</sub>H<sub>30</sub>N<sub>3</sub>O<sub>6</sub>, 468.2129; found, 468.2113.

### Cyclo(L-Orn(Z)-N-Bip-L-Orn(Z)) (19)

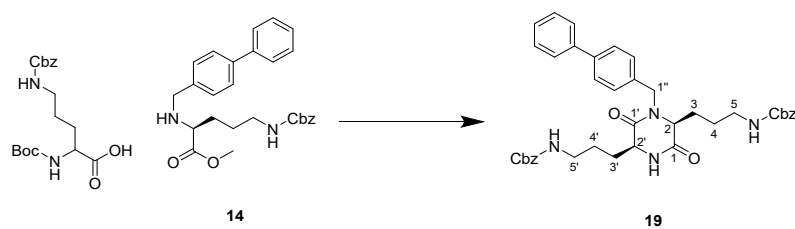

To a solution of Boc-L-Orn(Z)-OH (0.49 g, 1.34 mmol) and DIC (0.21 mL, 1.34 mmol) in THF (5 mL) was added DIPEA (0.36 mL, 2.02 mmol), and the mixture stirred at rt for 1 min. A solution of amino acid **14** (0.30 g, 0.67 mmol) in THF (40 mL) was then added, and the mixture stirred at rt for a further 16 h. The solvent was then removed *in vacuo*, and the resulting residue redissolved in EtOAc (10 mL). The organic layer was then washed with HCl (1 M, 10 mL), sat. aq. NaHCO<sub>3</sub> (10 mL), dried over anhydrous MgSO<sub>4</sub>, filtered, and concentrated *in vacuo* to afford intermediate **16** (0.23 g, 42%) as a colourless solid.

To a solution of dipeptide **16** (0.23 g, 0.28 mmol) in DCM (3 mL) was added TFA (3 mL), and the mixture stirred at rt for 1 h. The mixture was then concentrated *in vacuo* and the resulting residue taken up in *n*-BuOH (0.1 M AcOH, 30 mL). To this mixture (at 120 °C) was added NMM (0.031 mL, 0.28 mmol), and the mixture heated at reflux for 16 h. The mixture was then allowed to cool to rt and diluted with EtOAc (20 mL). The organic layer was washed with H<sub>2</sub>O (10 mL), brine (10 mL), dried over anhydrous MgSO<sub>4</sub>, filtered, and concentrated *in vacuo*. Purification *via* flash chromatography (DCM-MeOH 19:1) afforded *title compound* **21** (0.12 g, 64%) as a colourless solid. <sup>1</sup>H NMR (400 MHz; CDCl<sub>3</sub>): δ 8.10 (s, 1H, H-NH), 7.54 – 7.24 (m, 19H, H-Ar), 5.43 – 5.40 (m, 1H, H-NH), 5.32 – 5.29 (m, 1H, H-NH), 5.04 (s, 4H, H-Cbz), 4.00 – 3.95 (m, 3H, H-1'', H-2'), 3.86 – 3.83 (m, 1H, H-2), 3.17 – 3.09 (m, 4H, H-5, H-5'), 2.04 – 1.53 (m, 8H, H-3, H-3', H-4, H-4'); HRMS (ESI +) *m/z*: [M + Na]<sup>+</sup> calcd for C<sub>39</sub>H<sub>42</sub>N<sub>4</sub>NaO<sub>6</sub>, 685.2997; found, 685.2991.

### Cyclo(L-Bip-N-Bip-L-Orn(Z)) (20)

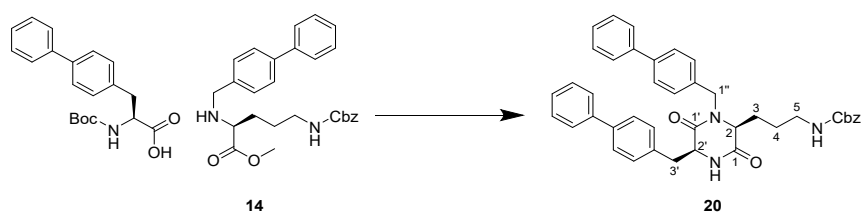

A similar method to that described for compound **16** was followed using Boc-L-Bip-OH (0.31 g, 0.90 mmol), amino acid **14** (0.20 g, 0.45 mmol), DIC (0.14 mL, 0.90 mmol), DIPEA (0.24 mL, 1.34 mmol) and THF (10 mL). Concentration *in vacuo* afforded intermediate **17** (0.31 g, 90 %) as a colourless solid.

A similar method to that described for compound **19** was followed using dipeptide **17** (0.31 g, 0.40 mmol), DCM (5 mL) and TFA (5 mL), then *n*-BuOH (0.1 M AcOH, 10 mL) and NMM (0.044 mL, 0.40 mmol). Purification *via* flash chromatography (Pet. Ether-EtOAc 1:1) afforded *title compound* **20** (0.20 g, 73%) as a colourless solid. **<sup>1</sup>H NMR** (400 MHz; CDCl<sub>3</sub>): δ 7.54 – 7.24 (m, 23H, H-Ar), 6.76 (s, 1H, H-NH), 5.25 (d, *J* = 14.7 Hz, 1H, H<sub>a</sub>-1''), 5.01 (s, 2H, H-Cbz), 4.84 (brt, 1H, H-NH), 4.35 – 4.33 (m, 1H, H-2'), 4.04 (d, *J* = 14.7 Hz, 1H, H<sub>b</sub>-1''), 3.85 – 3.81 (m, 1H, H-2), 3.31 (ABX, *J* = 13.5, 2.8 Hz, 1H, H<sub>a</sub>-3'), 3.16 (ABX, *J* = 13.5, 7.9 Hz, 1H, H<sub>b</sub>-3'), 3.04 – 2.94 (m, 2H, H-5), 1.79 – 1.71 (m, 1H, H<sub>a</sub>-3), 1.36 – 1.28 (m, 3H, H<sub>b</sub>-3, H-4); **<sup>13</sup>C NMR** (100 MHz; CDCl<sub>3</sub>): δ 167.4 (C, C-1), 165.5 (C, C-1'), 156.4 (C, C-Cbz), 141.1 (C, C-Ar), 140.5 (C, C-Ar), 140.4 (C, C-Ar), 140.3 (C, C-Ar), 136.6 (C, C-Ar), 134.7 (C, C-Ar), 134.5 (C, C-Ar), 130.5 (2 × CH, C-Ar), 129.0 (2 × CH, C-Ar), 128.93 (2 × CH, C-Ar), 128.90 (2 × CH, C-Ar), 128.6 (2 × CH, C-Ar), 128.2 (CH, C-Ar), 128.17 (CH, C-Ar), 127.7 (2 × CH, C-Ar), 127.6 (5 × CH, C-Ar), 127.2 (2 × CH, C-Ar), 127.0 (2 × CH, C-Ar), 66.7 (CH<sub>2</sub>, C-Cbz), 58.2 (CH, C-2), 57.0 (CH, C-2'), 47.2 (CH<sub>2</sub>, C-1''), 40.8 (CH<sub>2</sub>, C-3'), 40.4 (CH<sub>2</sub>, C-5), 29.1 (CH<sub>2</sub>, C-3), 25.2 (CH<sub>2</sub>, C-4); **HRMS** (ESI+) *m/z*: [M + Na]<sup>+</sup> calcd for C<sub>41</sub>H<sub>39</sub>N<sub>3</sub>NaO<sub>4</sub>, 660.2833; found, 660.2835.

### Cyclo(L-Bip-N-(N-phthyolylpropylamine)-L-Orn(Z)) (21)

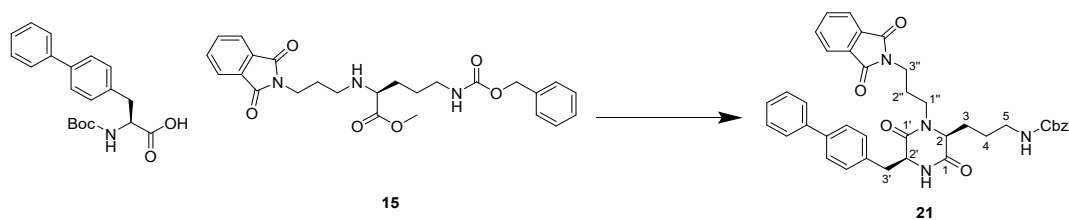

A similar method to that described for compound **16** was followed using Boc-L-Bip-OH (0.58 g, 1.71 mmol), amino acid **15** (0.20 g, 0.43 mmol), DIC (0.27 mL, 1.71 mmol), DIPEA (0.30 mL, 1.71 mmol) and THF (10 mL). Concentration *in vacuo* afforded intermediate **18** (0.18 g, 53 %) as a colourless solid.

A similar method to that described for compound **19** was followed using dipeptide **18** (0.18 g, 0.23 mmol), DCM (2 mL) and TFA (2 mL), then *n*-BuOH (0.1 M AcOH, 5 mL) and NMM (0.025 mL, 0.23 mmol). Purification *via* flash chromatography (Pet. Ether-EtOAc 3:7) afforded *title compound* **21** (0.13 g, 87%) as a colourless solid. **<sup>1</sup>H NMR** (400 MHz; CDCl<sub>3</sub>): δ 7.68 – 7.23 (m, 18H, H-Ar), 6.73 (s, 1H, H-NH), 5.14 (brt, 1H, H-NH), 5.00 (s, 2H, H-Cbz), 4.26 – 4.24 (m, 1H, H-2'), 3.91 – 3.90 (m, 1H, H-2), 3.74 – 3.67 (m, 3H, H<sub>a</sub>-1'', H-3''), 3.22 – 3.00 (m, 5H, H-3', H-5, H<sub>b</sub>-1''), 2.06 – 1.98 (m, 1H, H<sub>a</sub>-2''), 1.95 – 1.86 (m, 1H, H<sub>b</sub>-2''), 1.75 – 1.72 (m, 1H, H<sub>a</sub>-3), 1.39 – 1.36 (m, 2H, H-4), 1.22 – 1.17 (m, 1H, H<sub>b</sub>-3); **<sup>13</sup>C NMR** (100 MHz; CDCl<sub>3</sub>): δ 168.4 (2 × C, C-Phth), 167.2 (C, C-1), 165.4 (C, C-1'), 156.5 (C, Cbz), 140.4 (C, C-Ar), 140.3 (C, C-Ar), 136.7 (C, C-Ar), 134.8 (C, C-Ar), 134.1 (2 × CH, C-Phth), 132.0 (2 × C, C-Phth), 130.5 (2 × CH, C-Ar), 130.0 (2 × CH, C-Ar), 128.5 (2 × CH, C-Ar), 128.1 (3 × CH, C-Ar), 127.5 (3 × CH, C-Ar), 127.0 (2 × CH, C-Ar), 123.4 (2 × CH, C-Phth), 66.6 (CH<sub>2</sub>, C-Cbz), 59.5 (CH, C-2), 56.9 (CH, C-2'), 43.0 (CH<sub>2</sub>, C-1''), 40.6 (CH<sub>2</sub>, C-3'), 40.3 (CH<sub>2</sub>, C-5), 35.7 (CH<sub>2</sub>, C-3''), 29.9 (CH<sub>2</sub>, C-3), 26.6 (CH<sub>2</sub>, C-2''), 25.4 (CH<sub>2</sub>, C-4); **HRMS** (ESI) *m/z*: [M + Na]<sup>+</sup> calcd for C<sub>39</sub>H<sub>38</sub>N<sub>4</sub>NaO<sub>6</sub>, 681.2684; found, 681.2679.



### Cyclo(*N*-(*N*-phthaloylpropylamine)-*L*-Bip-*N*-Bip-*L*-Orn(*Z*)) (**24**)

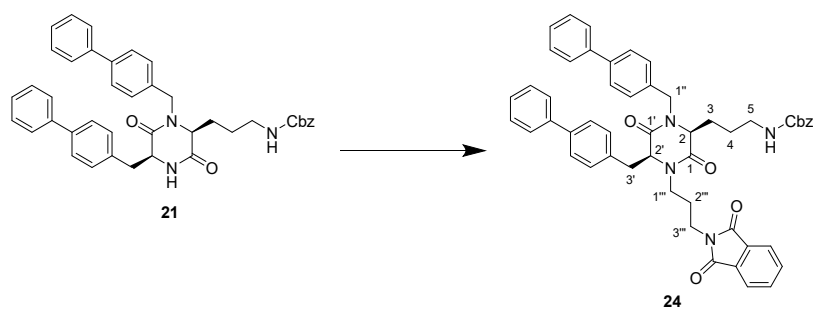

To a solution of DKP **21** (0.2 g, 0.31 mmol) in DMF (5 mL) under nitrogen at  $-40\text{ }^{\circ}\text{C}$  was added dropwise KHMDS (0.9 M, 0.52 mL, 0.47 mmol), and the mixture stirred for 1 h. To this mixture was added a solution of *N*-(3-bromopropyl)phthalimide (0.17 g, 0.63 mmol) in DMF (3 mL), and the mixture stirred at  $-40\text{ }^{\circ}\text{C}$  for a further 16 h. The mixture was then poured into sat. aq.  $\text{NH}_4\text{Cl}$  (20 mL) and extracted with DCM ( $3 \times 5\text{ mL}$ ). The combined organic layers were washed with brine (5 mL), dried over anhydrous  $\text{MgSO}_4$ , filtered, and concentrated *in vacuo*. Purification *via* flash column chromatography (Pet. Ether-EtOAc 1:1) afforded *title compound* **24** (0.07 g, 27%) as pale yellow solid.  $^1\text{H NMR}$  (400 MHz;  $\text{CDCl}_3$ ):  $\delta$  7.78 – 7.75 (m, 2H, H-Phth), 7.66 – 7.64 (m, 2H, H-Phth), 7.55 – 7.20 (m, 23H, H-Ar), 5.20 (d,  $J = 14.9\text{ Hz}$ , 1H,  $\text{H}_a\text{-1}''$ ), 5.04 – 4.98 (m, 2H, H-Cbz), 4.75 – 4.72 (m, 1H, H-NH), 4.42 (t,  $J = 4.8\text{ Hz}$ , 1H, H-2'), 4.01 – 3.91 (m, 2H,  $\text{H}_b\text{-1}''$ ,  $\text{H}_a\text{1}'''$ ), 3.72 – 3.63 (m, 3H, H-2, H-3'''), 3.33 – 3.23 (m, 2H, H-3'), 2.97 – 2.80 (m, 3H,  $\text{H}_b\text{-1}'''$ , H-5), 2.02 – 1.94 (m, 2H, H-2'''), 1.39 – 1.32 (m, 3H,  $\text{H}_a\text{-3}$ , H-4), 0.65 – 0.63 (m, 1H,  $\text{H}_b\text{-3}$ );  $^{13}\text{C NMR}$  (100 MHz;  $\text{CDCl}_3$ ):  $\delta$  168.3 ( $2 \times \text{C}$ , C-Phth), 166.2 (C, C-1), 165.6 (C, C-1'), 156.4 (C, C-Cbz), 141.1 (C, C-Ar), 140.6 (C, C-Ar), 140.5 (C, C-Ar), 140.3 (C, C-Ar), 136.7 (C, C-Ar), 134.8 (C, C-Ar), 134.6 (C, C-Ar), 134.1 ( $2 \times \text{CH}$ , C-Phth), 132.0 ( $2 \times \text{C}$ , C-Ar), 130.5 ( $2 \times \text{CH}$ , C-Ar), 129.0 ( $2 \times \text{CH}$ , C-Ar), 128.9 ( $4 \times \text{CH}$ , C-Ar), 128.6 ( $2 \times \text{CH}$ , C-Ar), 128.2 ( $2 \times \text{CH}$ , C-Ar), 127.7 ( $2 \times \text{CH}$ , C-Ar), 127.6 (CH, C-Ar), 127.54 ( $2 \times \text{CH}$ , C-Ar), 127.48 ( $2 \times \text{CH}$ , C-Ar), 127.2 ( $2 \times \text{CH}$ , C-Ar), 127.0 ( $2 \times \text{CH}$ , C-Ar), 123.4 ( $2 \times \text{CH}$ , C-Phth), 66.6 ( $\text{CH}_2$ , C-Cbz), 61.7 (CH, C-2'), 58.5 (CH, C-2), 47.4 ( $\text{CH}_2$ , C-1''), 42.8 ( $\text{CH}_2$ , C-1'''), 40.3 ( $\text{CH}_2$ , C-5), 38.3 ( $\text{CH}_2$ , C-3'), 35.6 ( $\text{CH}_2$ , C-3'''), 30.2 ( $\text{CH}_2$ , C-3), 26.9 ( $\text{CH}_2$ , C-4), 26.3 ( $\text{CH}_2$ , C-2'''); **HRMS** (ESI+)  $m/z$ :  $[\text{M} + \text{H}]^+$  calcd for  $\text{C}_{52}\text{H}_{48}\text{N}_4\text{NaO}_6$ , 847.3466; found, 847.3473.

**Cyclo(L-Bip-N-(N,N'-di-Boc-propylguanidine)-L-Arg-N,N'-di-Boc) (25)**

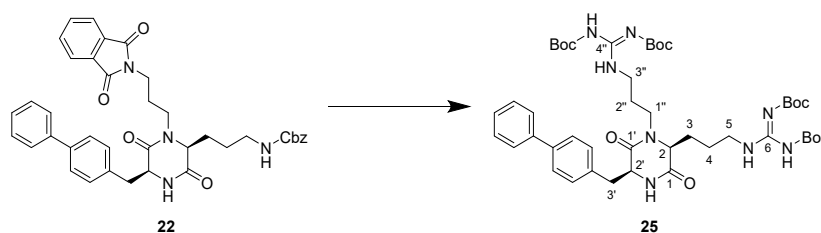

To a refluxing solution of DKP **22** (0.13 g, 0.20 mmol) in EtOH (2 mL) was added hydrazine hydrate (7  $\mu$ L, 0.22 mmol), and the mixture stirred at reflux for 16 h. The mixture was then allowed to cool to rt and filtered. The filtrate was concentrated *in vacuo* and the resulting residue redissolved in MeOH (2 mL). To this mixture was added Pd/C (0.02 g, 0.02 mmol 10% wt/wt), and the mixture stirred under H<sub>2</sub> at rt for 16 h. The mixture was then filtered through Celite® and the filtrate concentrated *in vacuo*. The residue was redissolved in H<sub>2</sub>O (0.5 mL) and to this mixture was added a solution of *N,N'*-di-boc-1*H*-pyrazole-1-carboxamide (0.13 g, 0.43 mmol) and TEA (0.081 mL, 0.59 mmol) in MeCN (4.5 mL), and the mixture stirred at rt for 6 h. The resulting precipitate was collected *via* vacuum filtration and dried *in vacuo*. Purification *via* flash column chromatography (neat EtOAc) afforded *title compound 25* (0.094 g, 55%) as a colourless solid. <sup>1</sup>H NMR (400 MHz; CDCl<sub>3</sub>):  $\delta$  11.49 (s, 1H, H-NH), 11.44 (s, 1H, H-NH), 8.50 (t, *J* = 5.6 Hz, 1H, H-NH), 8.30 (t, *J* = 5.3 Hz, 1H, H-NH), 7.59 – 7.28 (m, 9H, H-Ar), 6.35 (d, *J* = 2.7 Hz, 1H, H-NH), 4.31 (m, 1H, H-2'), 3.94 – 3.87 (m, 2H, H-2, H<sub>a</sub>-1''), 3.59 – 3.51 (m, 1H, H<sub>a</sub>-3''), 3.41 – 3.28 (m, 4H, H-5, H<sub>a</sub>-3', H<sub>b</sub>-3''), 3.05 – 2.94 (m, 2H, H<sub>b</sub>-3', H<sub>b</sub>-1''), 1.99 – 1.76 (m, 3H, H-2'', H<sub>a</sub>-3), 1.63 – 1.38 (m, 39H, H<sub>b</sub>-3, H-4, H-Boc); <sup>13</sup>C NMR (100 MHz; CDCl<sub>3</sub>):  $\delta$  166.9 (C, C-1), 165.6 (C, C-1'), 163.63 (C, C-Boc), 163.60 (C, C-Boc), 156.3 (C, C-6 or 4''), 156.2 (C-6 or 4''), 153.4 (C, C-Boc), 153.3 (C, C-Boc), 140.5 (C, C-Ar), 140.4 (C, C-Ar), 134.8 (C, C-Ar), 130.3 (2  $\times$  CH, C-Ar), 128.9 (2  $\times$  CH, C-Ar), 127.7 (2  $\times$  CH, C-Ar), 127.5 (CH, C-Ar), 127.0 (2  $\times$  CH, C-Ar), 83.22 (C, C-Boc), 83.19 (C, C-Boc), 79.3 (2  $\times$  C, C-Boc), 59.4 (CH, C-2), 57.0 (CH, C-2'), 42.7 (CH<sub>2</sub>, C-1''), 41.0 (CH<sub>2</sub>, C-3'), 40.1 (CH<sub>2</sub>, C-5), 38.2 (CH<sub>2</sub>, C-3''), 30.2 (CH<sub>2</sub>, C-3), 28.4 (6  $\times$  CH<sub>3</sub>, C-Boc), 28.2 (3  $\times$  CH<sub>3</sub>, C-Boc), 28.1 (3  $\times$  CH<sub>3</sub>, C-Boc), 27.0 (CH<sub>2</sub>, C-2''), 24.9 (CH<sub>2</sub>, C-4).

## Cyclo(Gly-L-Orn(Z)) (26)

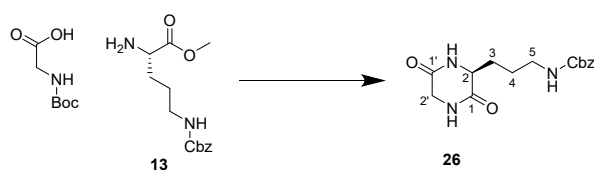

To a solution of Boc-Gly (0.37 g, 2.14 mmol), HATU (0.81 g, 2.14 mmol) and 6-Cl-HOBt (0.36 g, 2.14 mmol) in DMF (20 mL) was added DIPEA (1.14 mL, 6.42 mmol), and the mixture stirred at rt for 5 min. L-Orn(Z)-OMe.HCl (**13**) (0.60 g, 2.14 mmol), was then added, and the mixture stirred at rt for a further 5 h. The mixture was then poured into H<sub>2</sub>O (150 mL) and extracted with DCM (3 × 20 mL). The combined organic layers were washed with H<sub>2</sub>O (3 × 60 mL), brine (2 × 60 mL), dried over anhydrous MgSO<sub>4</sub>, filtered, then concentrated *in vacuo* to afford dipeptide **25** (0.9 g, 96%) as a colourless solid which was used without further purification.

To a solution of dipeptide **25** (0.9 g, 2.06 mmol) in DCM (10 mL) was added TFA (5 mL), and the mixture stirred at rt for 1 h. The mixture was then concentrated and the resulting residue taken up in *s*-BuOH (0.1 M AcOH, 50 mL). To this mixture (at 120 °C) was added NMM (0.23 mL, 2.06 mmol), and the mixture heated at reflux for 16 h. The mixture was then cooled to 0 °C and the resulting precipitate collected *via* vacuum filtration. The solid was washed with cold MeOH (2 × 20 mL) and dried *in vacuo* to afford *title compound* **26** (0.28 g, 45%) as a colourless solid which was used without further purification. <sup>1</sup>H NMR (400 MHz; DMSO): δ 8.16 (s, 1H, H-NH), 7.99 (s, 1H, H-NH), 7.38 – 7.29 (m, 5H, H-Cbz), 7.27 (brt, 5.3 Hz, 1H, H-NH), 5.00 (s, 2H, H-Cbz), 3.79 – 3.64 (m, 3H, H-2, H-2'), 3.01 – 2.96 (m, 2H, H-5), 1.67 – 1.63 (m, 2H, H-3), 1.46 – 1.43 (m, 2H, H-4); <sup>13</sup>C NMR (100 MHz; DMSO): δ 167.8 (C, C-1), 166.0 (C, C-1'), 156.1 (C, C-Cbz), 137.2 (C, C-Cbz), 128.3 (2 × CH, C-Cbz), 127.7 (3 × CH, C-Cbz), 65.1 (CH<sub>2</sub>, C-Cbz), 54.0 (CH, C-2), 44.2 (CH<sub>2</sub>, C-2'), 40.1 (CH<sub>2</sub>, C-5), 30.2 (CH<sub>2</sub>, C-3), 24.8 (CH<sub>2</sub>, C-4).

### Cyclo(Gly-L-Arg-N,N'-di-Boc) (**27**)

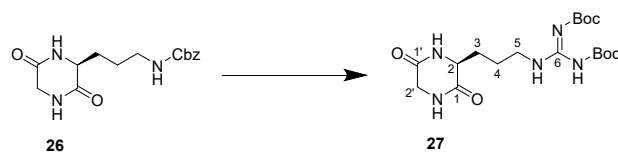

A similar method to that described for compound **4a** was followed using DKP **26** (0.25 g, 0.82 mmol), Pd/C (0.01 g, 0.01 mmol, 10% wt/wt) and DCM:AcOH (1:1, 6 mL), then H<sub>2</sub>O (1 mL), *N,N'*-di-Boc-1*H*-pyrazole-1-carboxamidine (0.23 g, 0.90 mmol), TEA (0.34 mL, 2.45 mmol) and MeCN (9 mL). Purification *via* flash chromatography (Pet. Ether-EtOAc 3:7) afforded *title compound* **27** (0.12 g, 81%) as a colourless solid. <sup>1</sup>H NMR (400 MHz; DMSO):  $\delta$  11.49 (s, 1H, H-NH), 8.33 (t, *J* = 5.5 Hz, 1H, H-NH), 8.18 (d, *J* = 2.0 Hz, 1H, H-NH), 8.00 (s, 1H, H-NH), 3.83 – 3.63 (m, 3H, H-2, H-2') 3.35 – 3.21 (m, 2H, H-5), 1.70 – 1.54 (m, 4H, H-3, H-4), 1.47 (s, 9H, H-Boc), 1.39 (s, 9H, H-Boc); <sup>13</sup>C NMR (100 MHz; DMSO):  $\delta$  167.8 (C, C-1), 166.0 (C, C-1'), 163.1 (C, C-Boc), 155.2 (C, C-6), 152.0 (C, C-Boc), 82.8 (C, C-Boc), 78.1 (C, C-Boc), 53.8 (CH, C-2), 44.2 (CH<sub>2</sub>, C-2'), 39.5 (CH<sub>2</sub>, C-5), 30.0 (CH<sub>2</sub>, C-3), 28.0 (3 × CH<sub>3</sub>, C-Boc), 27.6 (3 × CH<sub>3</sub>, C-Boc), 24.1 (CH<sub>2</sub>, C-4).

Cyclo(L-Bip-L-Bip) (29)

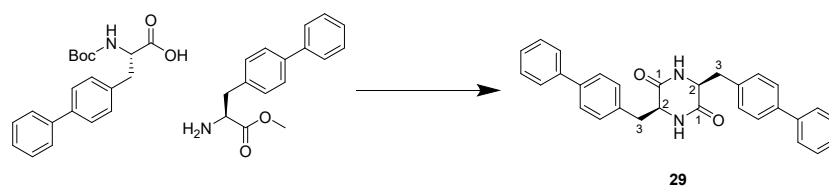

To a solution of Boc-L-Bip-OH (1.0 g, 2.93 mmol), HATU (1.11 g, 2.93 mmol) and 6-Cl-HOBt (0.50 g, 2.93 mmol) in DMF (30 mL) was added DIPEA (1.53 mL, 8.79 mmol), and the mixture stirred at rt for 5 min. L-Bip-OMe.HCl (0.75 g, 2.93 mmol) was then added, and the mixture stirred at rt for a further 5 h. The mixture was then poured into H<sub>2</sub>O (150 mL) and extracted with DCM (3 × 20 mL). The combined organic layers were washed with H<sub>2</sub>O (3 × 60 mL), brine (2 × 60 mL), dried over anhydrous MgSO<sub>4</sub>, filtered, then concentrated *in vacuo* to afford dipeptide **28** (1.69 g, 99%) as a colourless solid which was used without further purification.

To a solution of dipeptide **28** (1.69 g, 2.92 mmol) in DCM (25 mL) was added TFA (25 mL), and the mixture stirred at rt for 1 h. The mixture was then concentrated and the resulting residue taken up in *s*-BuOH (0.1 M AcOH, 50 mL). To this mixture (at 120 °C) was added NMM (0.30 mL, 2.92 mmol), and the mixture heated at reflux for 16 h. The mixture was then cooled to 0 °C and the resulting precipitate collected *via* vacuum filtration. The solid was washed with cold MeOH (2 × 20 mL) and dried *in vacuo* to afford *title compound* **29** (1.08 g, 83%) as a colourless solid which was used without further purification. <sup>1</sup>H NMR (400 MHz; DMSO): δ 8.03 (d, 2H, H-NH), 7.60 – 7.12 (m, 18H, H-Ar), 4.08 – 4.05 (m, 2H, H-2), 2.70 (dd, *J* = 13.6, 5.0 Hz, 2H, H<sub>a</sub>-3), 2.46 (dd, *J* = 13.6, 5.9 Hz, 2H, H<sub>b</sub>-3); <sup>13</sup>C NMR (100 MHz; DMSO): δ 166.3 (2 × C, C-1), 139.9 (2 × C, C-Ar), 138.3 (2 × C, C-Ar), 135.9 (2 × C, C-Ar), 130.4 (4 × CH, C-Ar), 128.9 (4 × CH, C-Ar), 127.2 (2 × CH, C-Ar), 126.4 (8 × CH, C-Ar), 55.3 (2 × CH, C-2), 38.7 (2 × CH<sub>2</sub>, C-3); HRMS (ESI) *m/z*: [M + Na]<sup>+</sup> calcd for C<sub>30</sub>H<sub>26</sub>N<sub>2</sub>NaO<sub>2</sub>, 469.1889; found, 469.1886.

### Cyclo(*N*-(*N*-phthaloylpropylamine)-*L*-Bip-*N*-(*N*-phthaloylpropylamine)-*L*-Bip) (**30**)

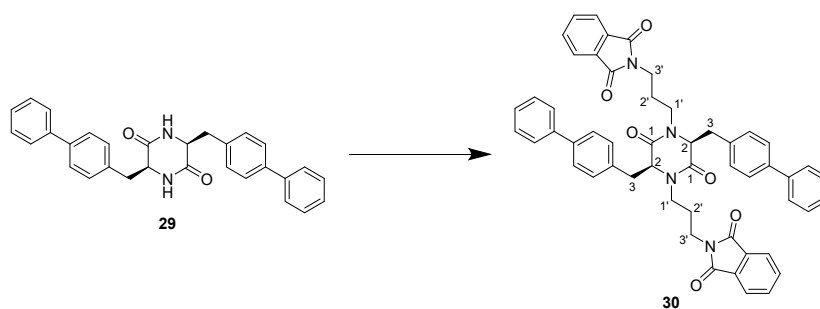

To a solution of DKP **29** (0.2 g, 0.45 mmol) in DMF (8 mL) under nitrogen at 0 °C was added NaH (0.06 g, 1.34 mmol, 60% immersed in mineral oil), and the mixture stirred at 0 °C for 1 h. To this mixture was then added a solution of *N*-(3-bromopropyl)phthalimide (0.6 g, 2.24 mmol) in DMF (2 mL), and the mixture heated at 80 °C for a further 16 h. The mixture was then poured into a solution of sat. aq. NH<sub>4</sub>Cl (20 mL) and extracted with DCM (3 × 5 mL). The combined organic layers were dried over anhydrous MgSO<sub>4</sub>, filtered, and concentrated *in vacuo*. Purification *via* flash chromatography (Pet. Ether-EtOAc 1:4) afforded *title compound* **30** (0.12 g, 33%) as a colourless solid. <sup>1</sup>H NMR (400 MHz; CDCl<sub>3</sub>): δ 7.73 – 7.71 (m, 4H, H-Phth), 7.62 – 7.60 (m, 4H, H-Phth), 7.49 – 7.29 (m, 14H, H-Ar), 7.11 (d, 4H, H-Ar), 4.25 (ABX, J = 6.6, 4.5 Hz, 2H, H-2), 3.92 – 3.85 (m, 2H, Ha-1'), 3.69 – 3.58 (m, 4H, H-3'), 2.89 (ABX, J = 14.3, 4.5 Hz, 2H, Ha-2), 2.72 (2H, Hb-1'), 2.40 (ABX, J = 14.3, 6.6 Hz, 2H, Hb-2), 2.07 (m, 4H, H-2'); <sup>13</sup>C NMR (100 MHz; CDCl<sub>3</sub>): δ 168.3 (4 × C, C-Phth), 165.8 (2 × C, C-1), 140.6 (2 × C, C-Ar), 140.3 (2 × C, C-Ar), 135.8 (2 × C, C-Ar), 134.0 (4 × CH, C-Ar), 132.0 (4 × C, C-Phth), 129.9 (4 × CH, C-Ar), 128.8 (4 × CH, C-Ar), 127.6 (4 × CH, C-Ar), 127.4 (2 × CH, C-Ar), 127.1 (4 × CH, C-Ar), 123.3 (4 × CH, C-Phth) 61.7 (2 × CH, C-2), 42.9 (2 × CH<sub>2</sub>, C-1'), 38.9 (2 × CH<sub>2</sub>, C-3), 35.5 (2 × CH<sub>2</sub>, C-3'), 25.9 (2 × CH<sub>2</sub>, C-2'); HRMS (ESI) *m/z*: [M + Na]<sup>+</sup> calcd for C<sub>52</sub>H<sub>44</sub>N<sub>4</sub>NaO<sub>6</sub>, 843.3153; found, 843.3123.

**Cyclo(*N*-Bip-L-Arg-*N*-Bip-L-Arg).2HCl (2)**

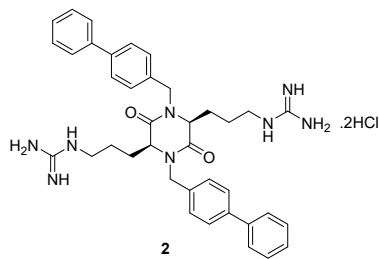

<sup>1</sup>H NMR (400 MHz, MeOD):

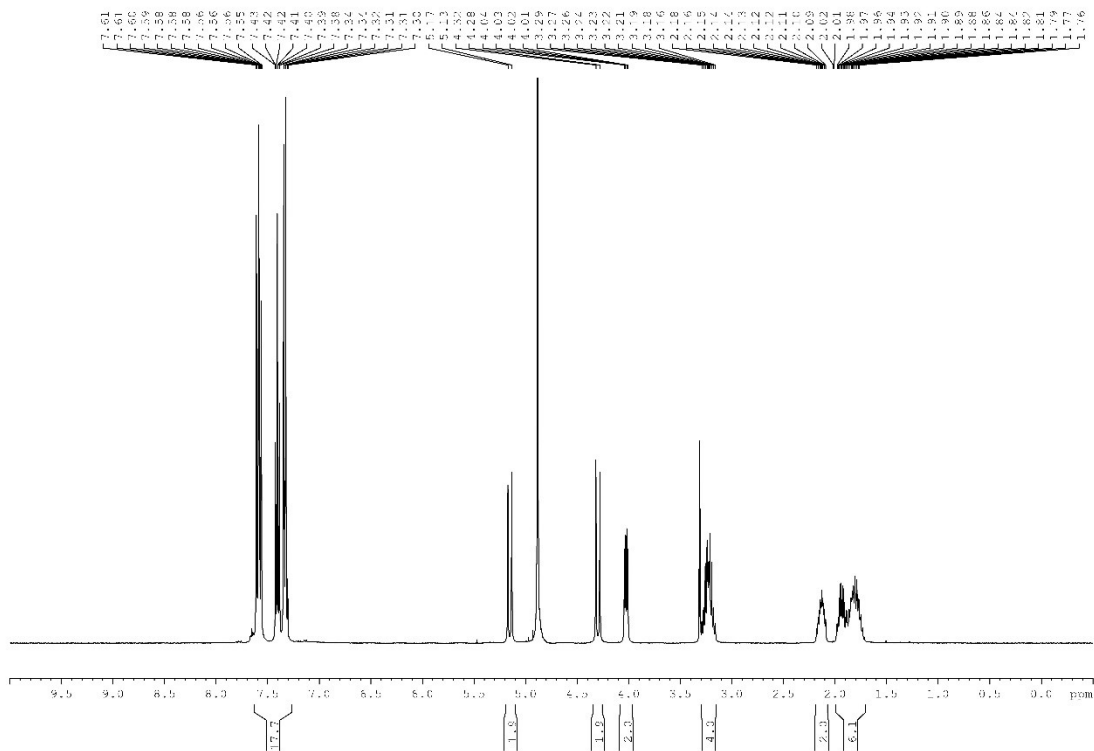

<sup>13</sup>C NMR (100 MHz, MeOD):

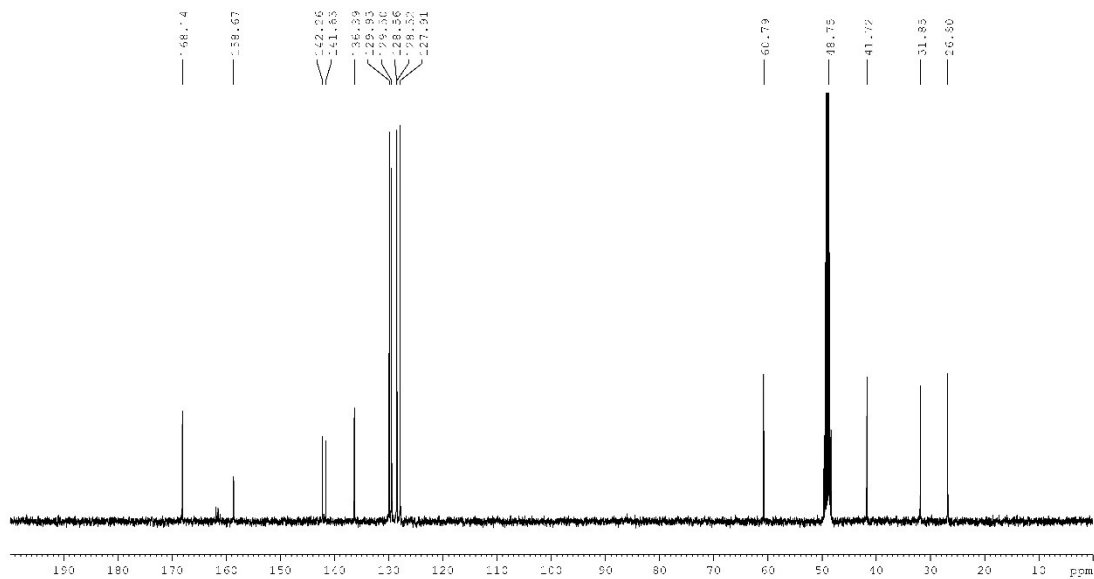

**Cyclo(L-Bip-L-Arg).HCl (3)**

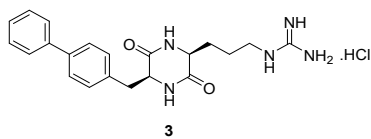

<sup>1</sup>H NMR (400 MHz, D<sub>2</sub>O):

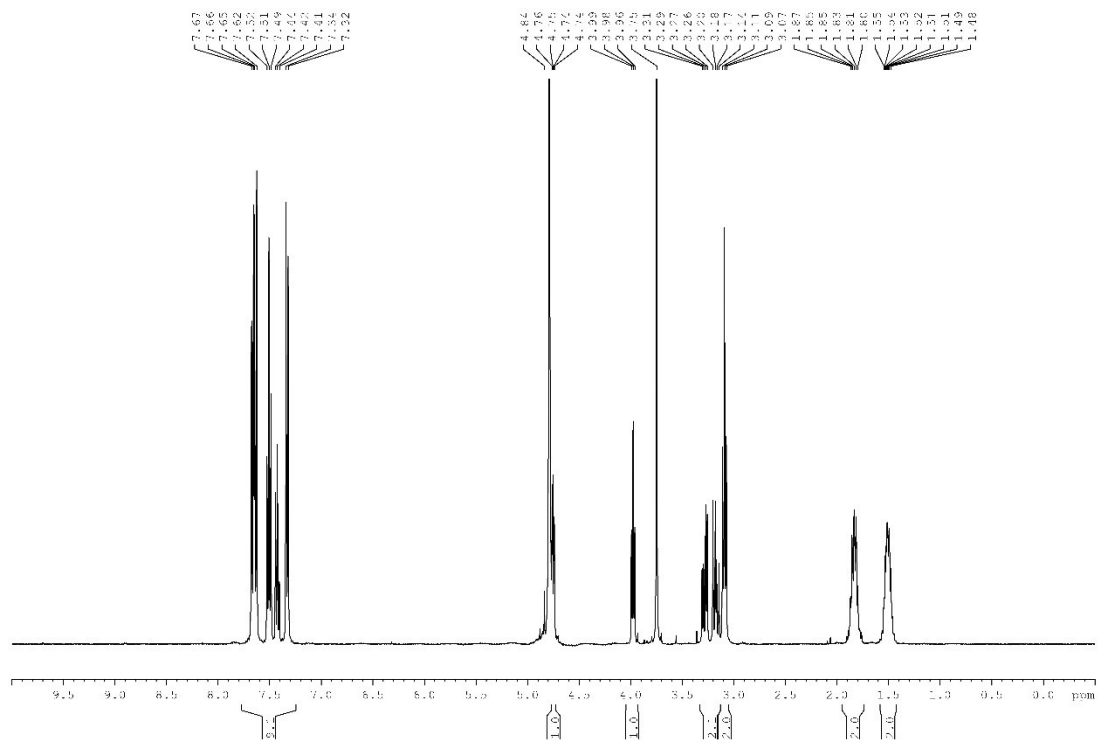

<sup>13</sup>C NMR (100 MHz, D<sub>2</sub>O):

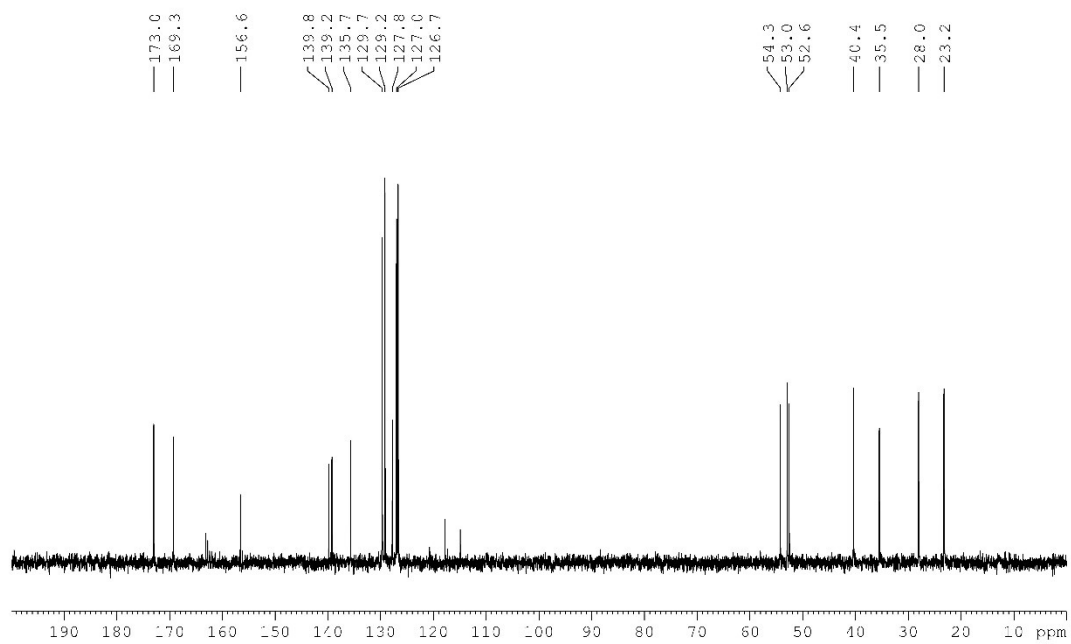











**Cyclo(*N*-Bip-L-Bip-*N*-(propylguanidine)-L-Arg).2HCl (8)**

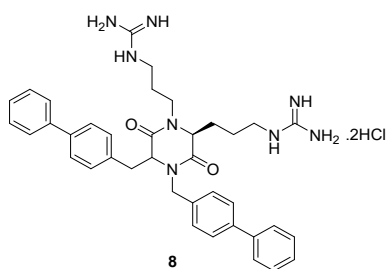

**<sup>1</sup>H NMR (400 MHz, MeOD):**

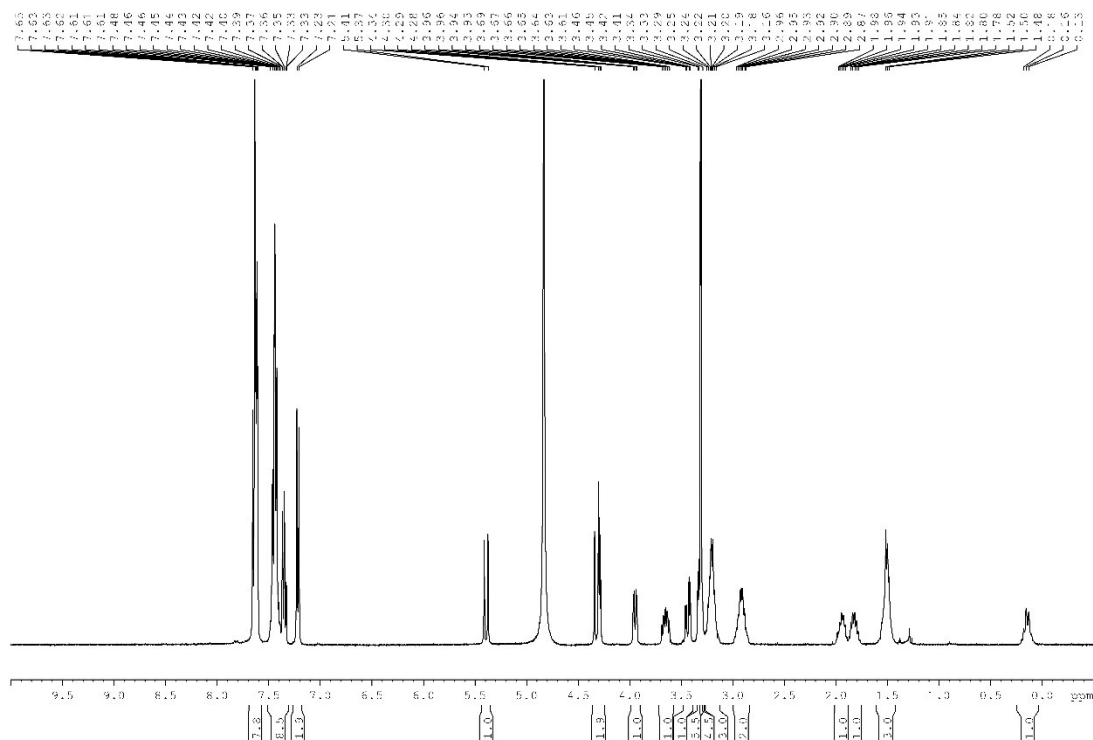

**<sup>13</sup>C NMR (100 MHz, MeOD):**

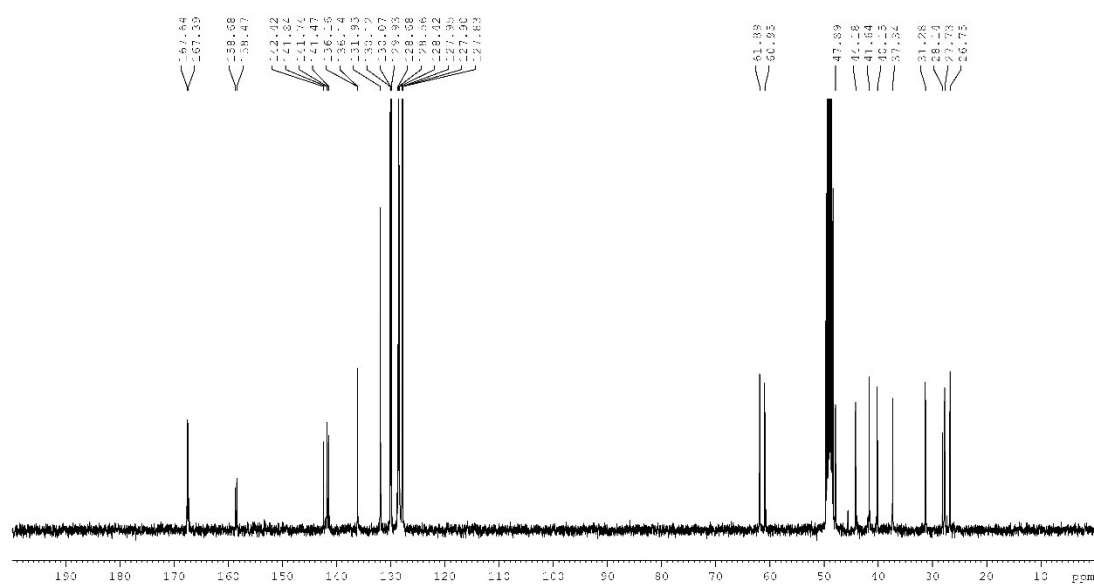

**Cyclo(*N*-Bip-D-Arg-*N*-Bip-D-Arg).2HCl (9)**

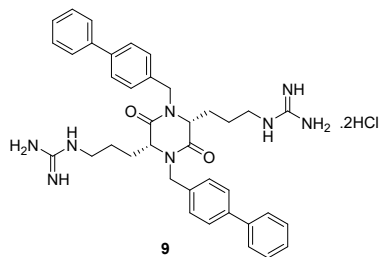

**<sup>1</sup>H NMR (400 MHz, MeOD):**

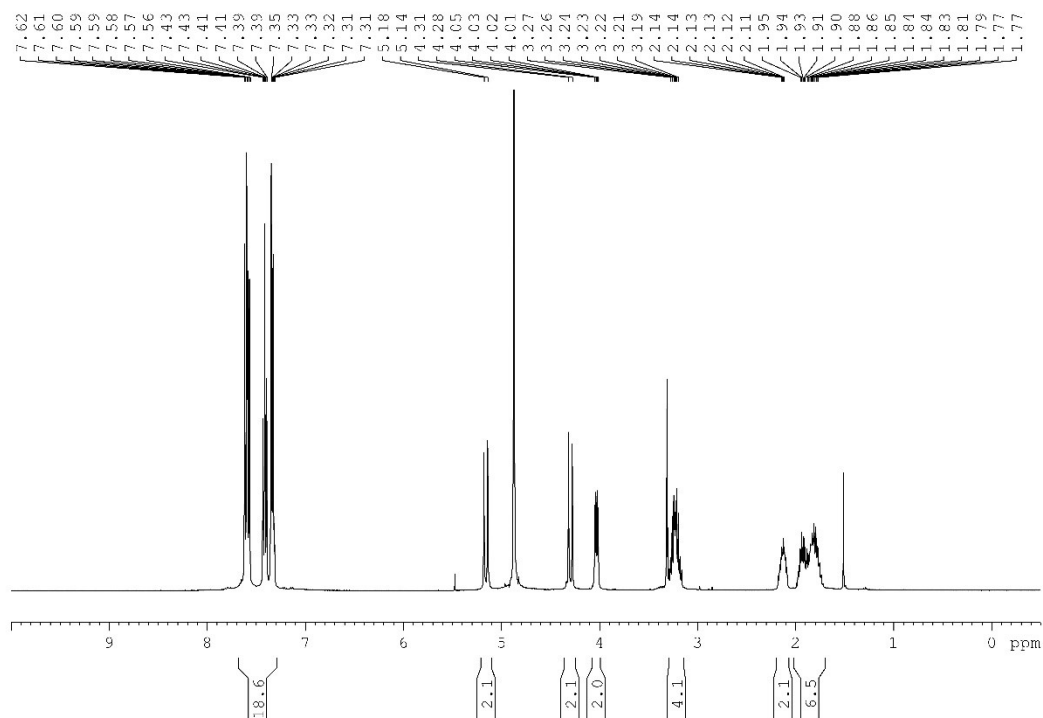

**<sup>13</sup>C NMR (100 MHz, MeOD):**

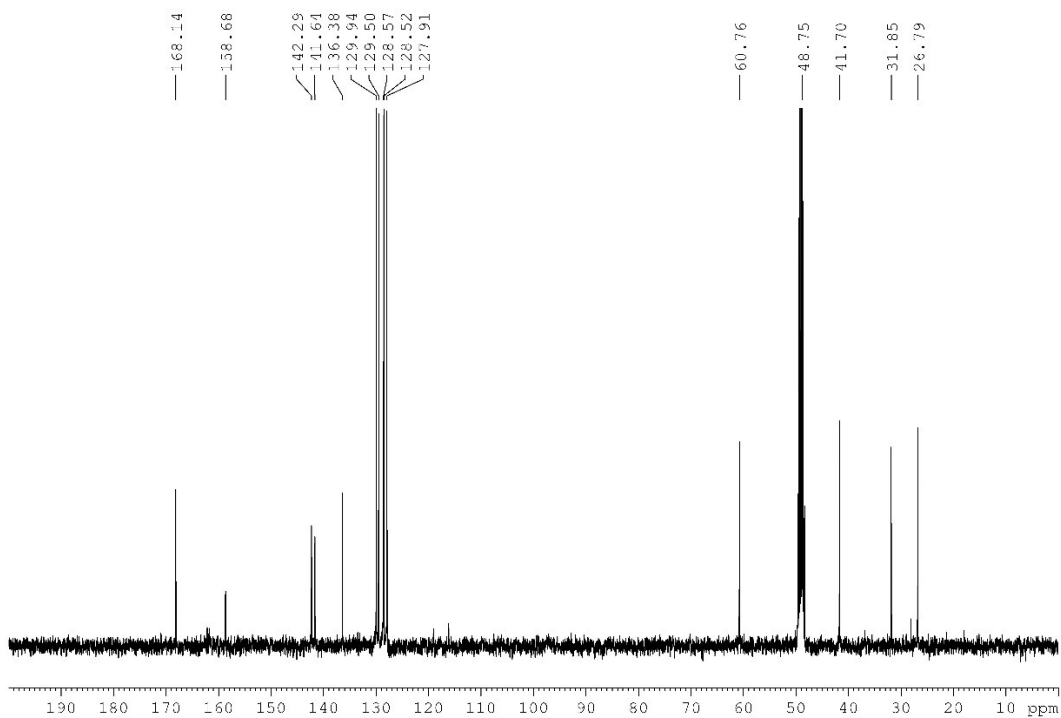

**Cyclo(*N*-Bip-L-Arg-*N*-Bip-D-Arg).2HCl (10)**

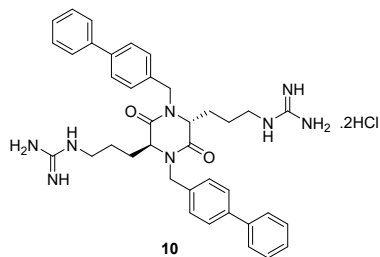

**<sup>1</sup>H NMR (400 MHz, MeOD):**

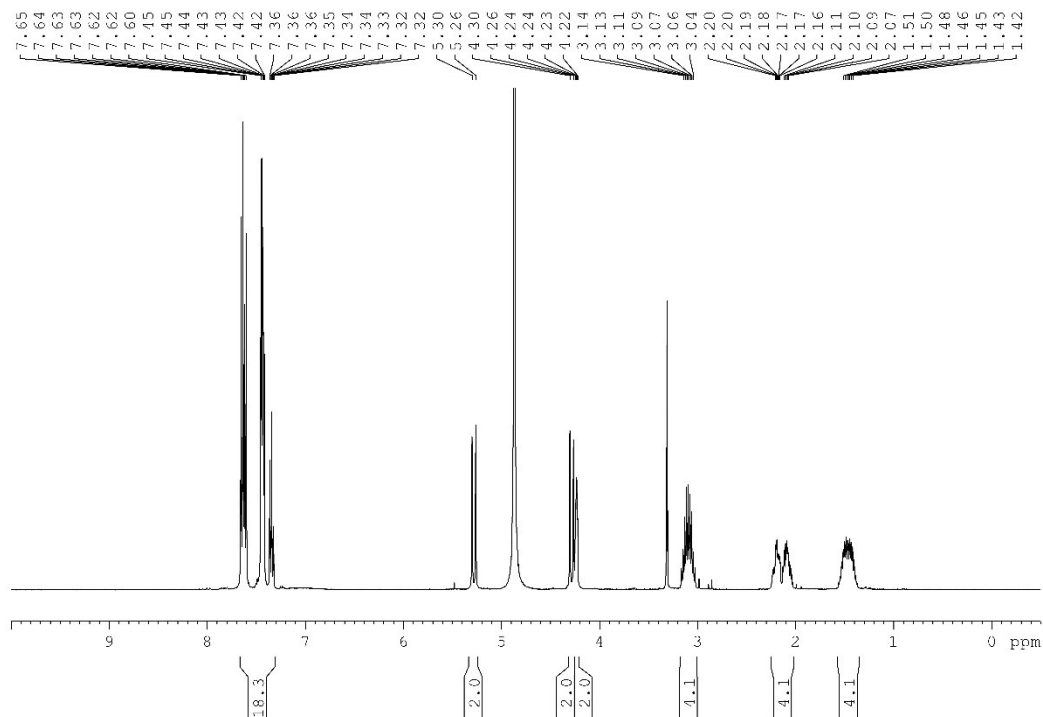

**<sup>13</sup>C NMR (100 MHz, MeOD):**

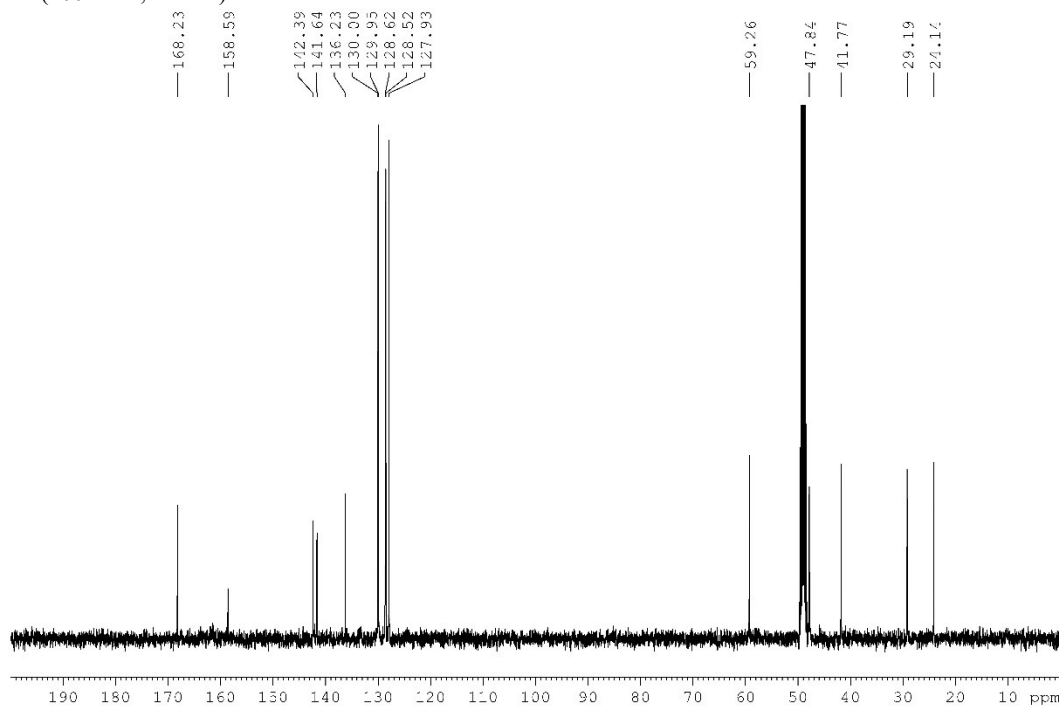

***N*-Bip-L-Orn(Z)-OMe (14)**

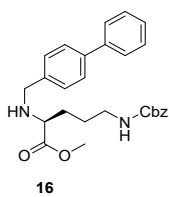

**<sup>1</sup>H NMR** (400 MHz, CDCl<sub>3</sub>):

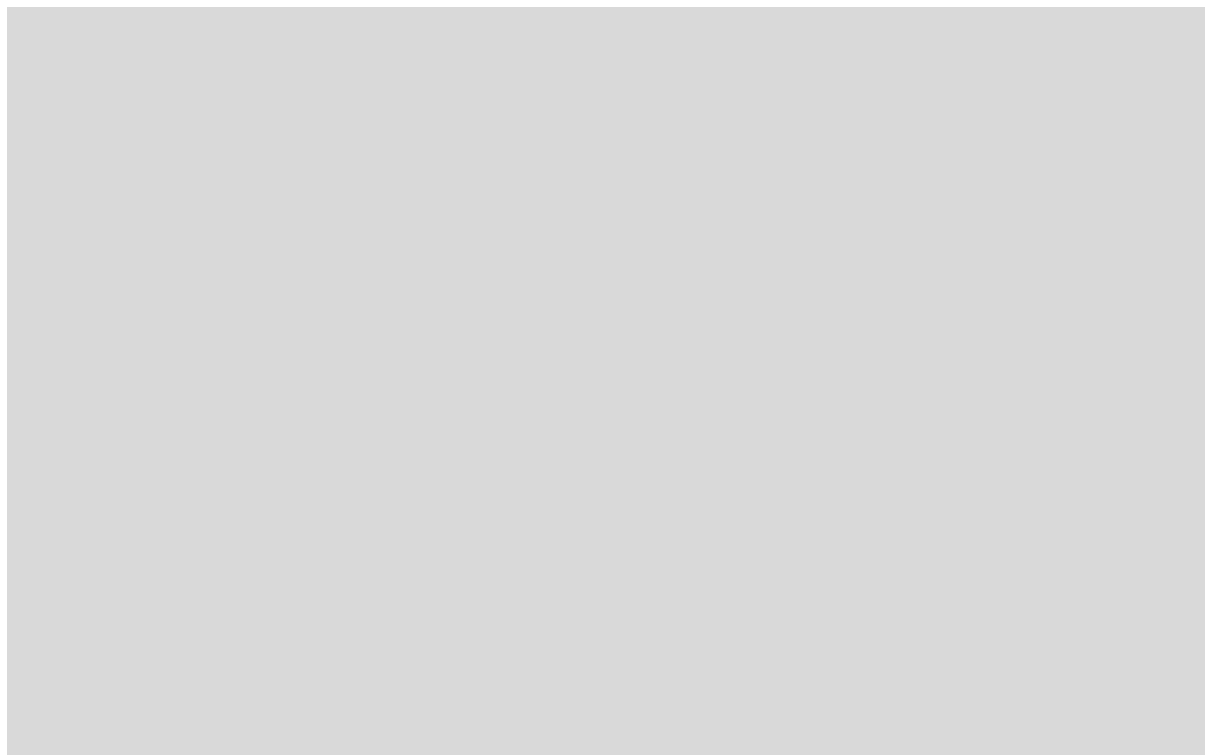

**<sup>13</sup>C NMR** (100 MHz, CDCl<sub>3</sub>):

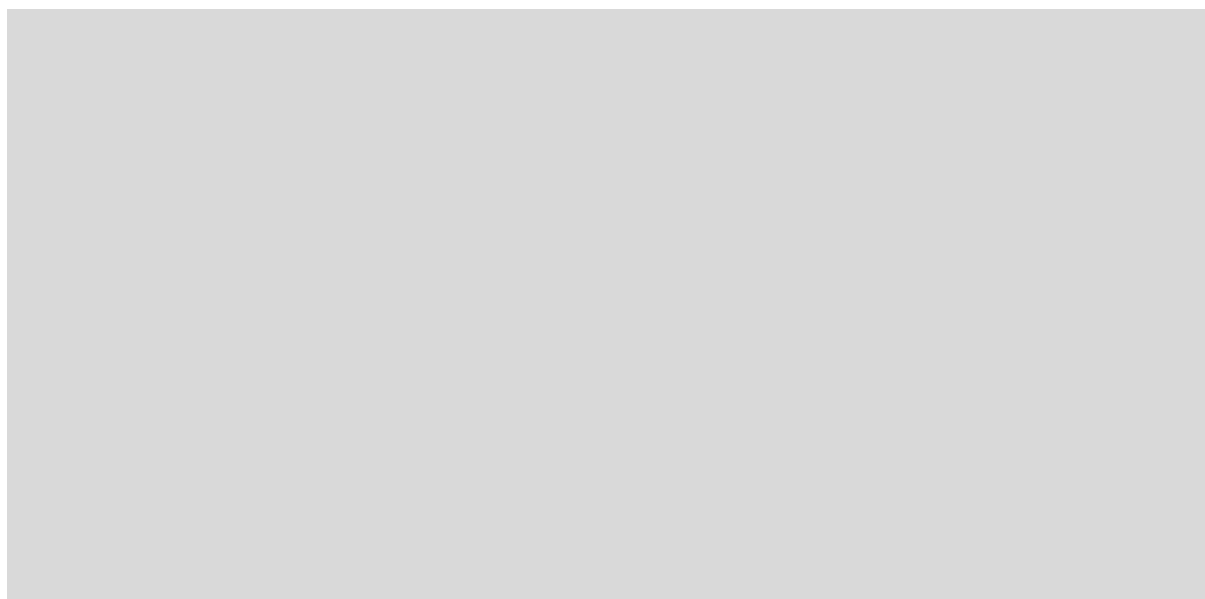



***N*-(*N*-phthaloylpropylamine)-*L*-Orn(*Z*)-OMe (15)**

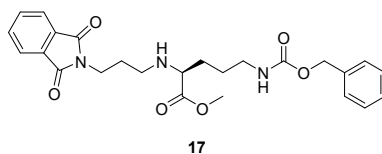

<sup>1</sup>H NMR (400 MHz, CDCl<sub>3</sub>):

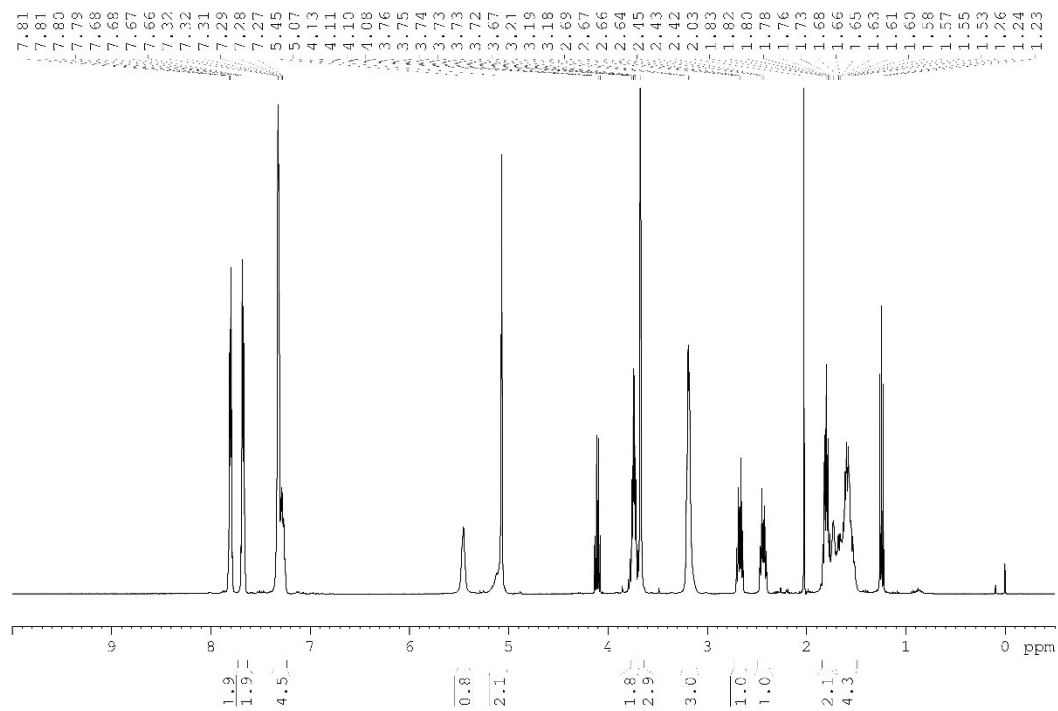

<sup>13</sup>C NMR (100 MHz, CDCl<sub>3</sub>):

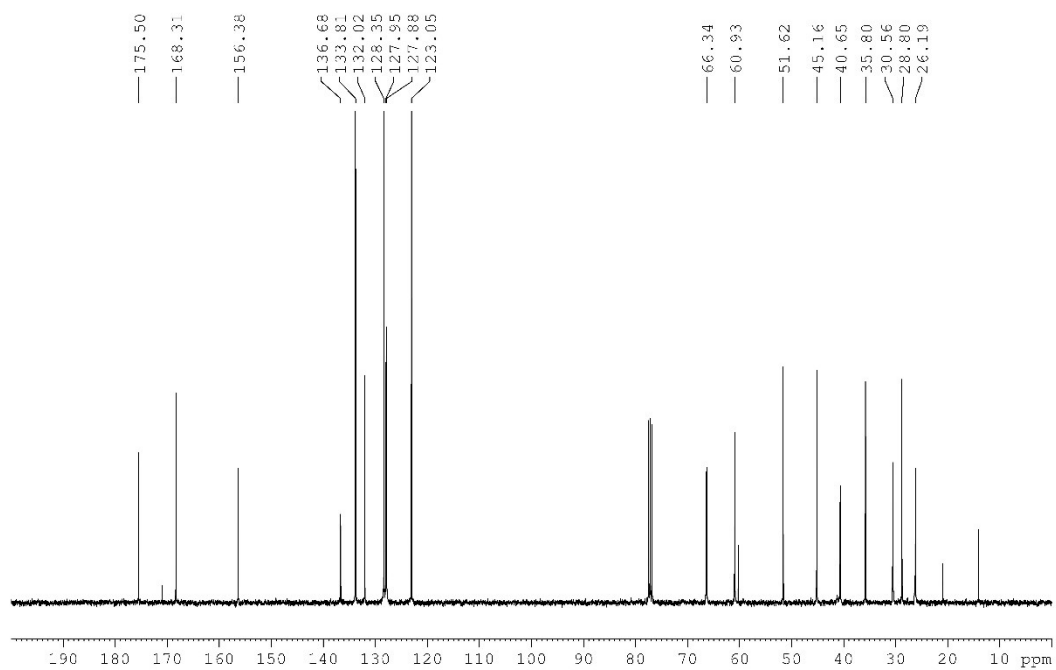

**Cyclo(L-Orn(Z))-N-Bip-L-Orn(Z) (19)**

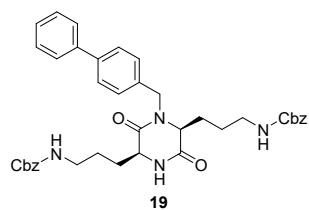

**<sup>1</sup>H NMR (400 MHz, DMSO):**

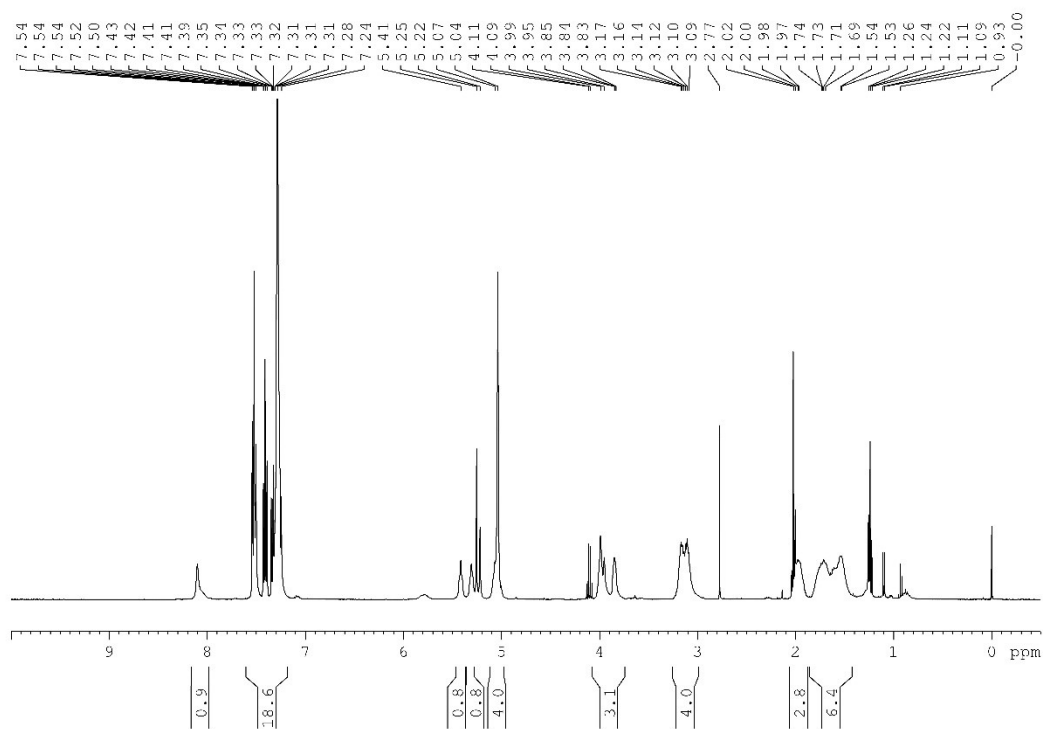

# Cyclo(L-Bip-N-Bip-L-Orn(Z)) (20)

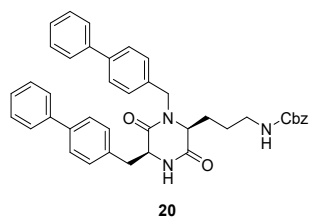

<sup>1</sup>H NMR (400 MHz, CDCl<sub>3</sub>):

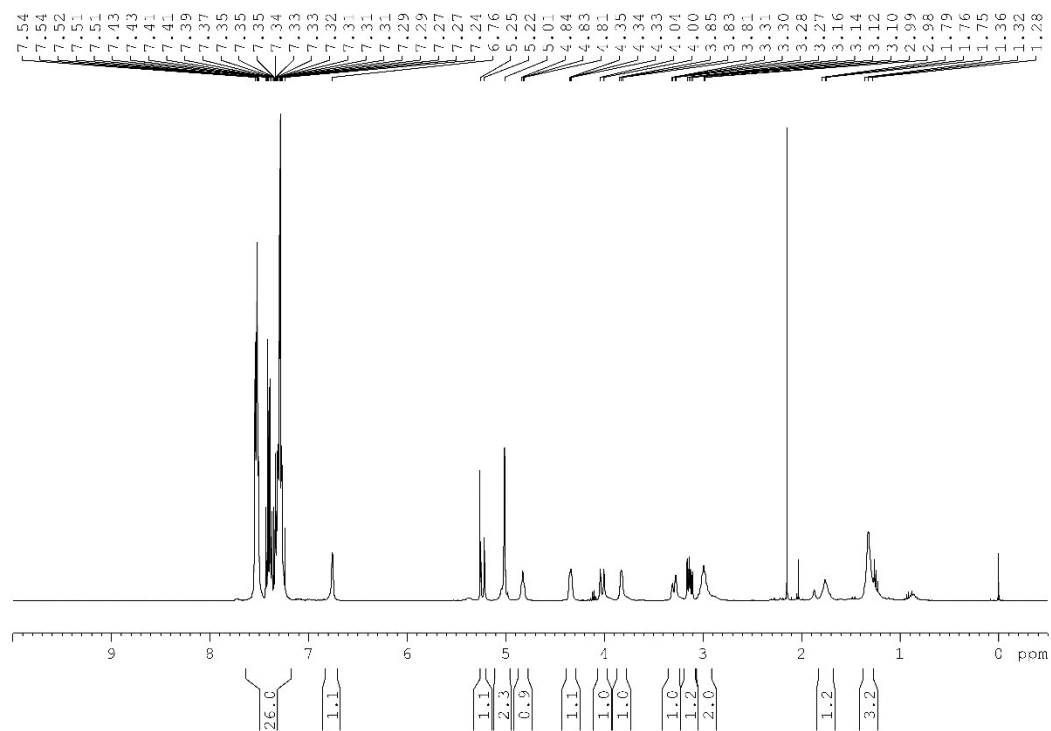

<sup>13</sup>C NMR (100 MHz, CDCl<sub>3</sub>):

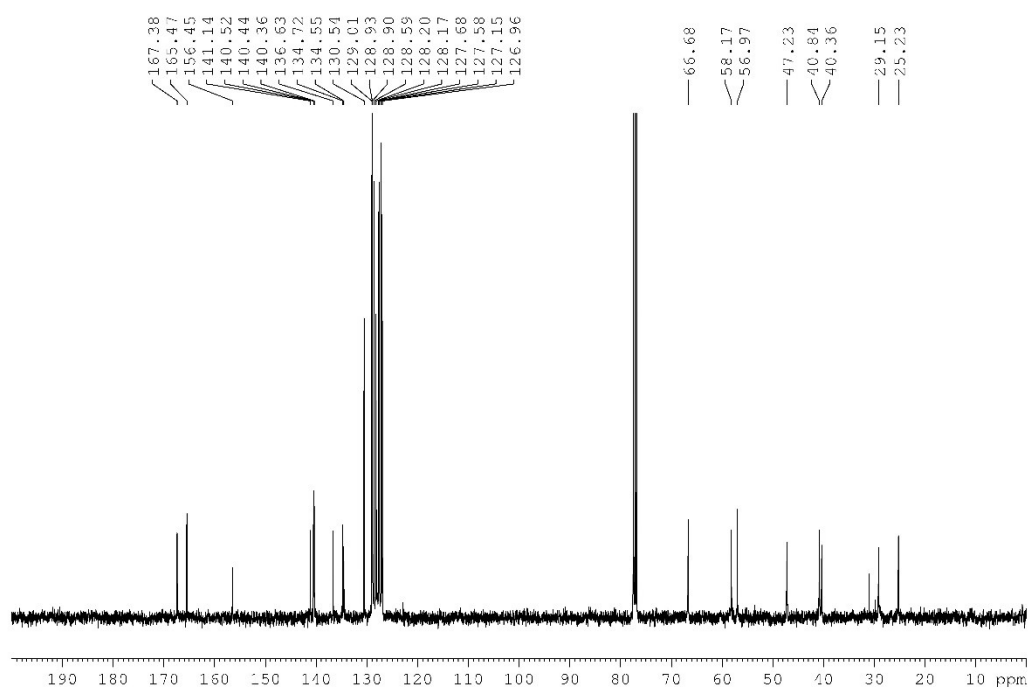







# Cyclo(Gly-L-Orn(Z)) (26)

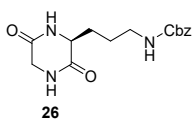

<sup>1</sup>H NMR (400 MHz, DMSO):

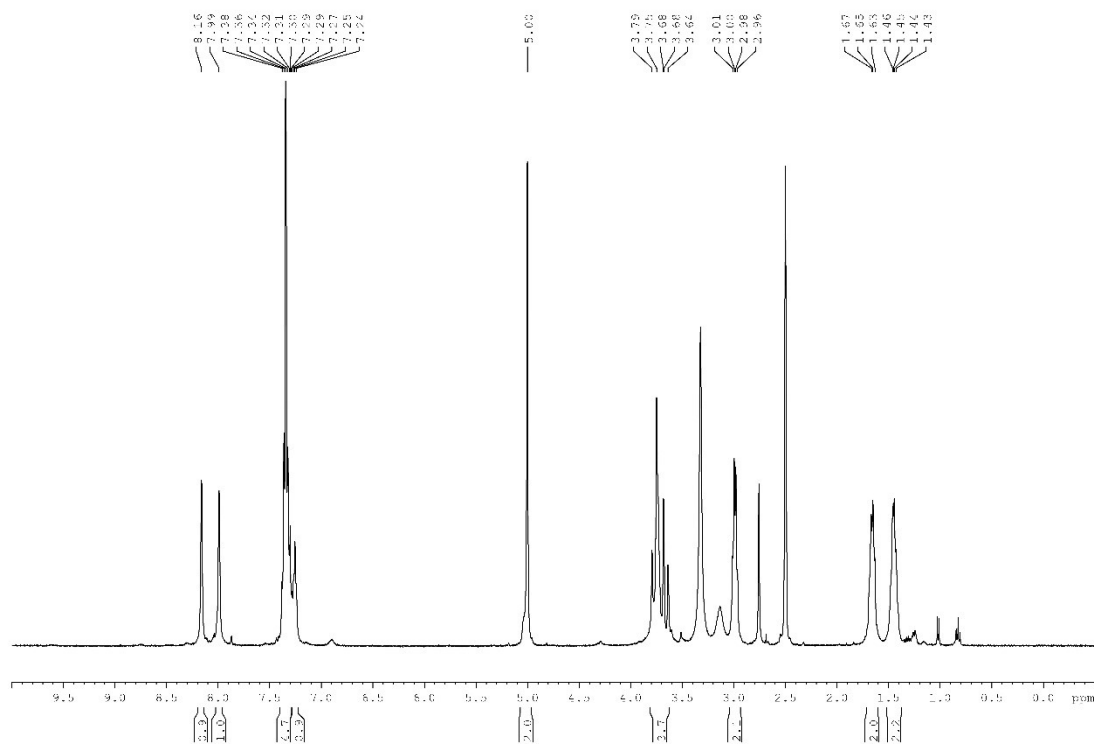

<sup>13</sup>C NMR (100 MHz, DMSO):

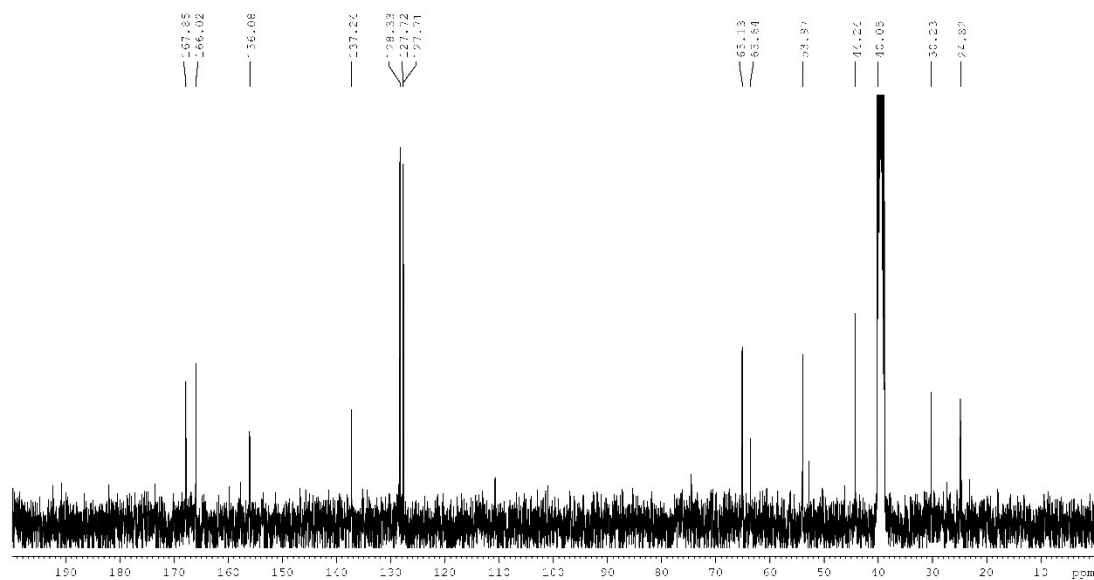

# Cyclo(Gly-L-Arg-N,N'-di-Boc) (27)

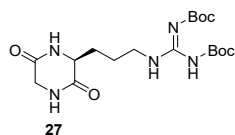

<sup>1</sup>H NMR (400 MHz, DMSO):

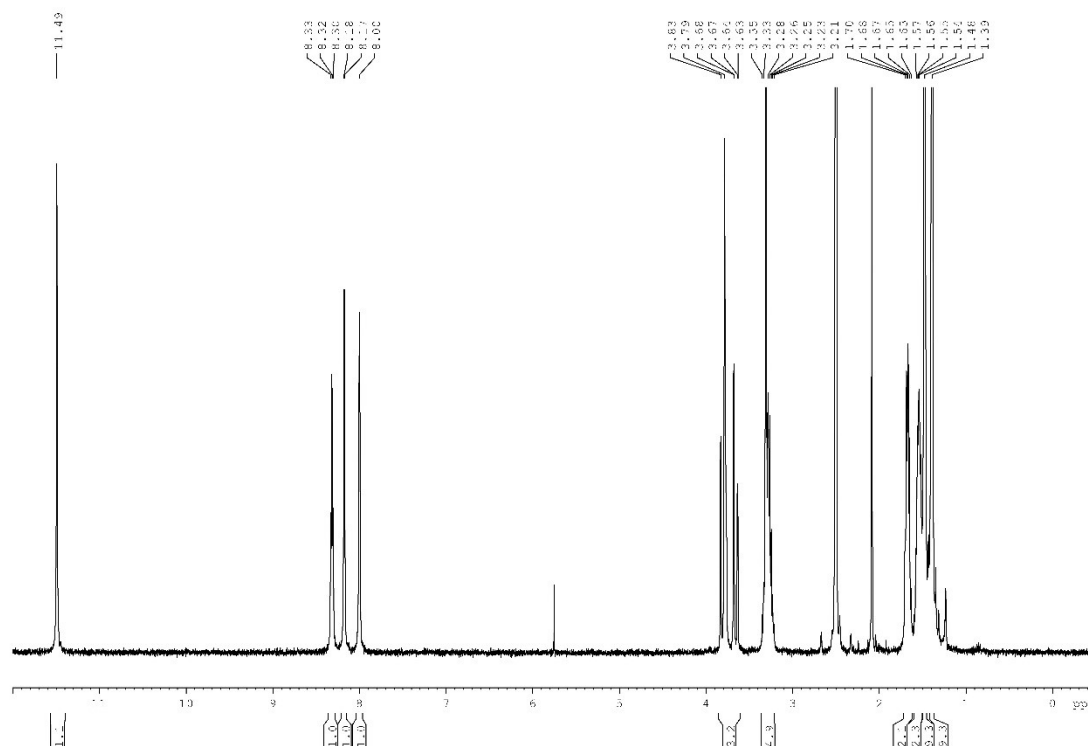

<sup>13</sup>C NMR (100 MHz, DMSO):

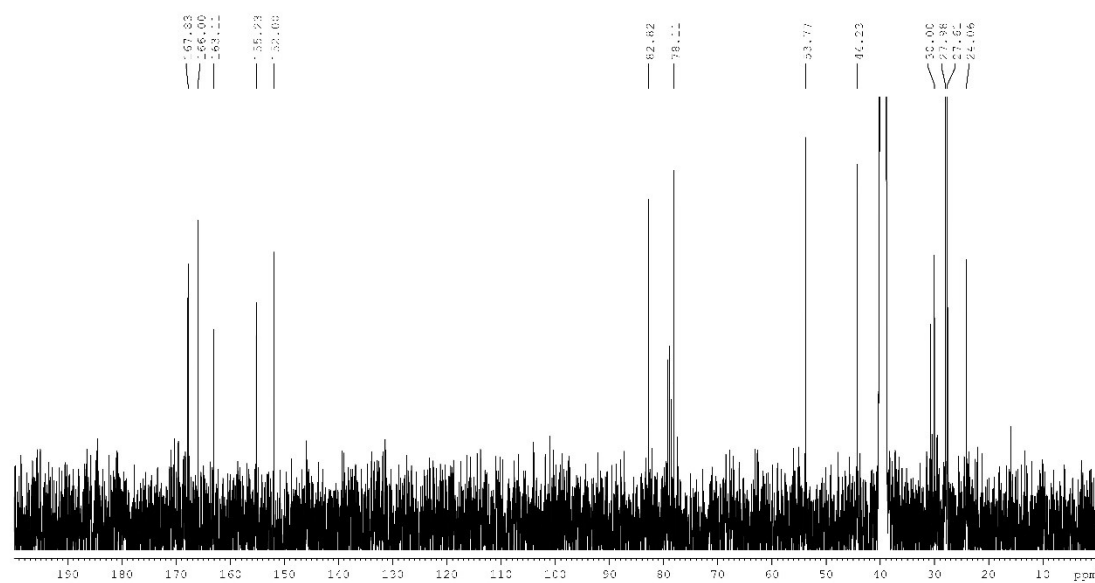



## Cyclo(L-Bip-L-Bip) (29)

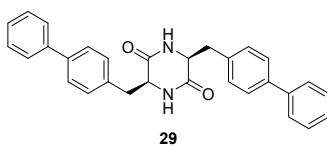

<sup>1</sup>H NMR (400 MHz, DMSO):

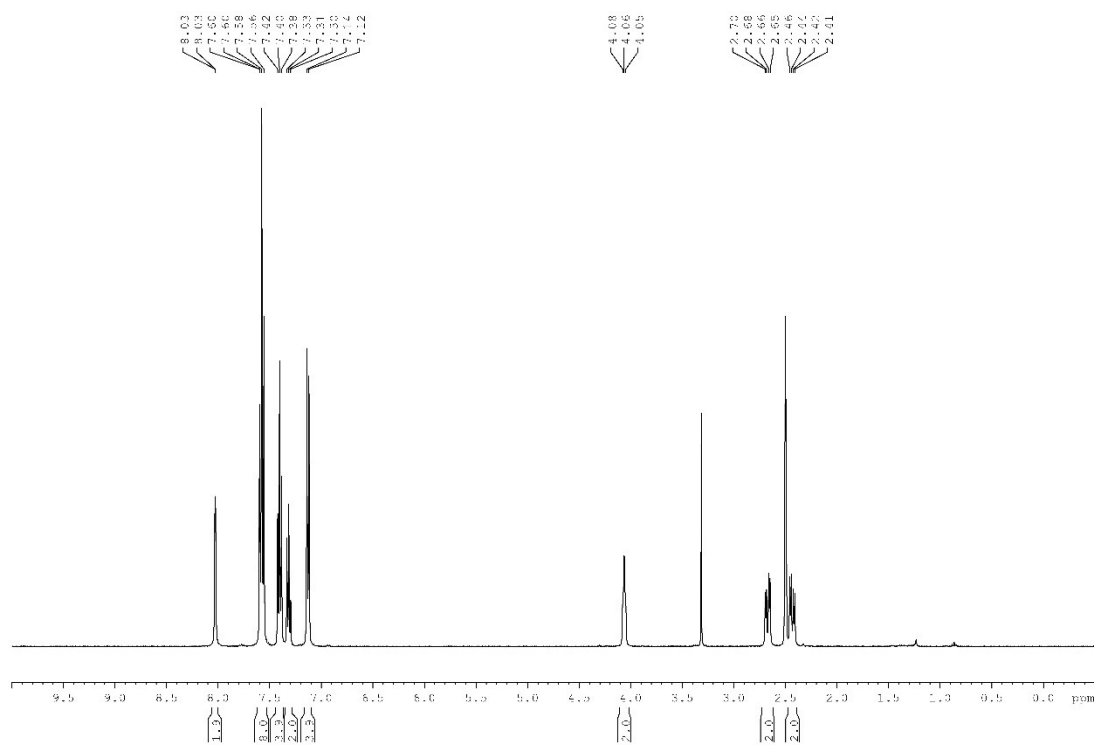

<sup>13</sup>C NMR (100 MHz, DMSO):

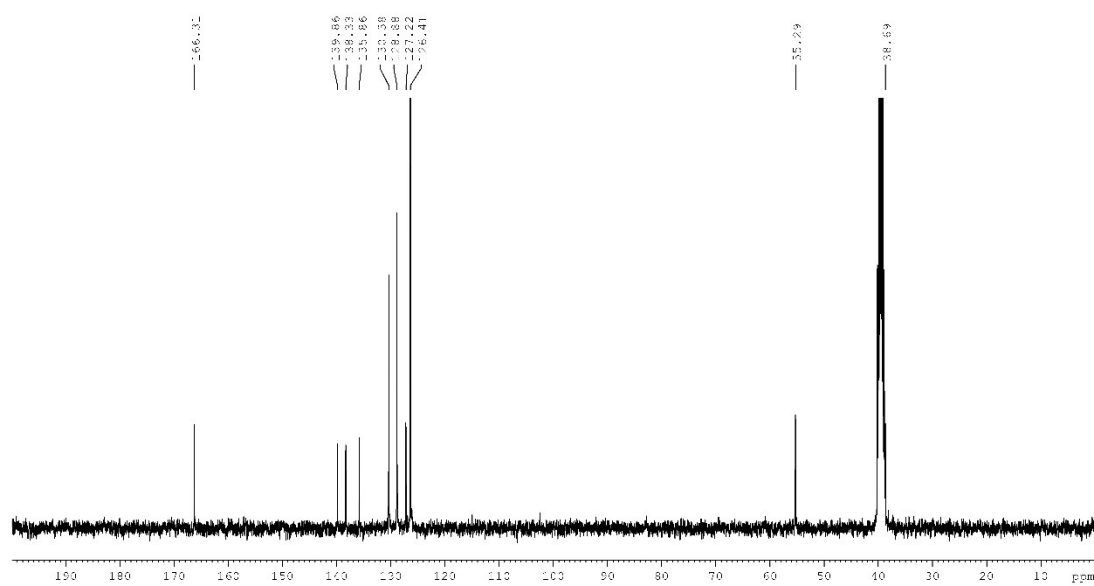

**Cyclo(*N*-(*N*-phthaloylpropylamine)-L-Bip-*N*-(*N*-phthaloylpropylamine)-L-Bip) (30)**

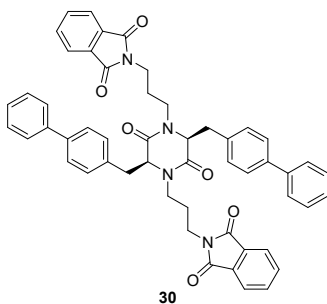

<sup>1</sup>H NMR (400 MHz, CDCl<sub>3</sub>):

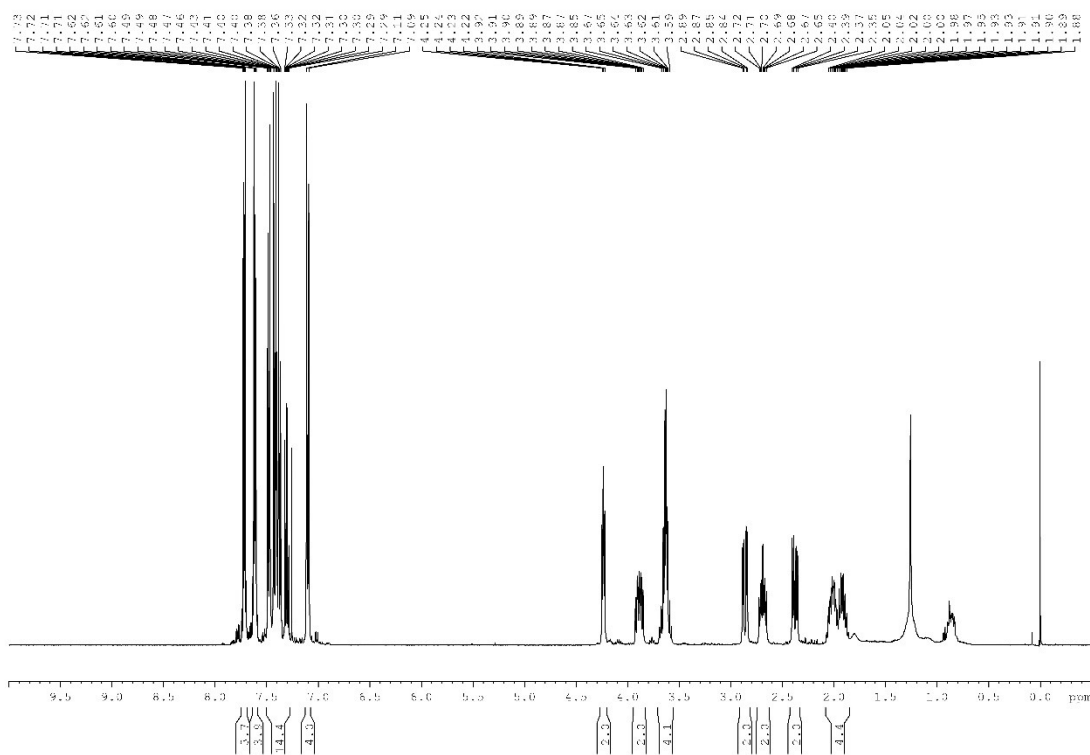

<sup>13</sup>C NMR (100 MHz, CDCl<sub>3</sub>):

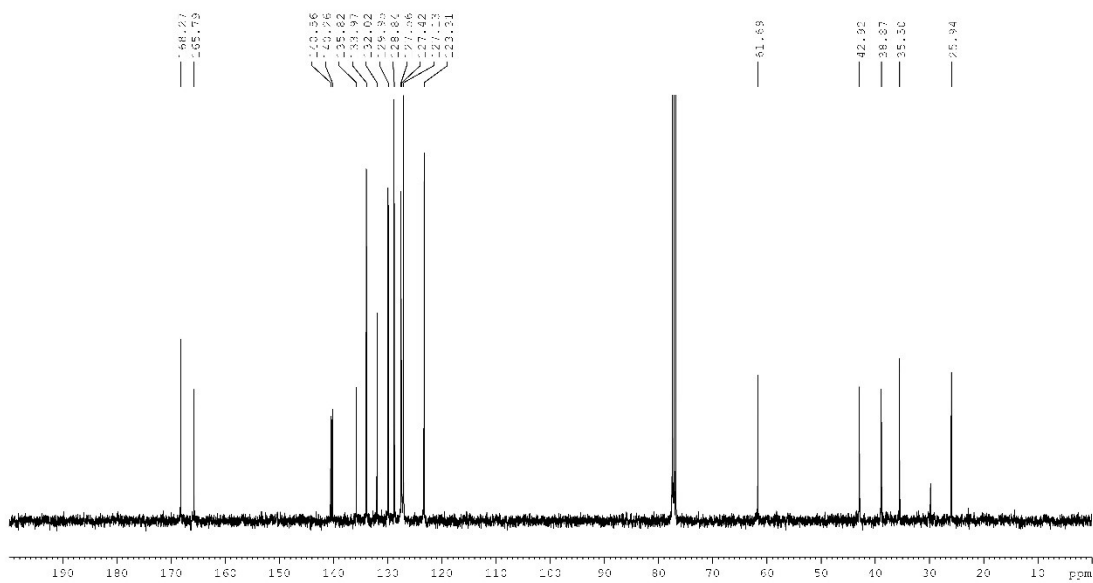

## Analytical RP-chromatograms of DKPs 2-10

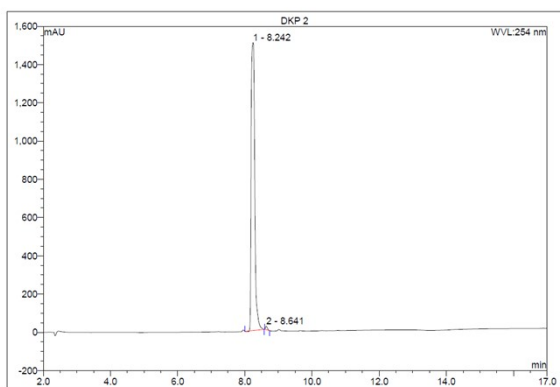

| No.           | Ret.Time<br>min | Peak Name | Height<br>mAU | Area<br>mAU*min | Rel.Area<br>% | Amount | Type |
|---------------|-----------------|-----------|---------------|-----------------|---------------|--------|------|
| 1             | 8.24            | n.a.      | 1505.125      | 185.256         | 99.35         | n.a.   | BMB* |
| 2             | 8.64            | n.a.      | 17.688        | 1.212           | 0.65          | n.a.   | BMB* |
| <b>Total:</b> |                 |           | 1522.813      | 186.469         | 100.00        | 0.000  |      |

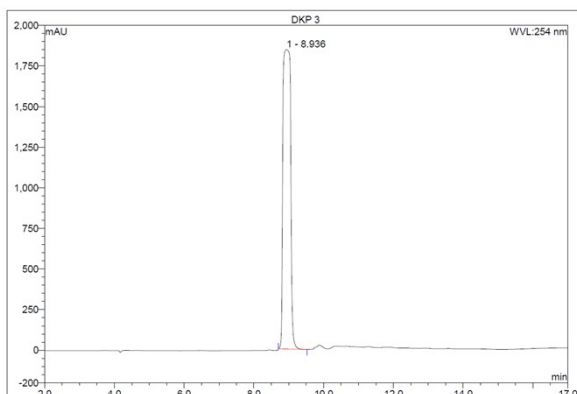

| No.           | Ret.Time<br>min | Peak Name | Height<br>mAU | Area<br>mAU*min | Rel.Area<br>% | Amount | Type |
|---------------|-----------------|-----------|---------------|-----------------|---------------|--------|------|
| 1             | 8.94            | n.a.      | 1843.292      | 470.428         | 100.00        | n.a.   | BMB* |
| <b>Total:</b> |                 |           | 1843.292      | 470.428         | 100.00        | 0.000  |      |

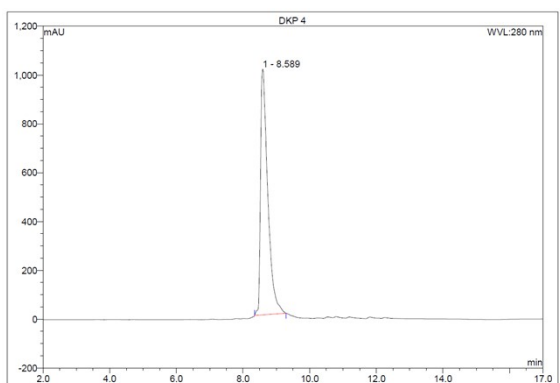

| No.           | Ret.Time<br>min | Peak Name | Height<br>mAU | Area<br>mAU*min | Rel.Area<br>% | Amount | Type |
|---------------|-----------------|-----------|---------------|-----------------|---------------|--------|------|
| 1             | 8.59            | n.a.      | 1005.664      | 253.550         | 100.00        | n.a.   | BMB* |
| <b>Total:</b> |                 |           | 1005.664      | 253.550         | 100.00        | 0.000  |      |

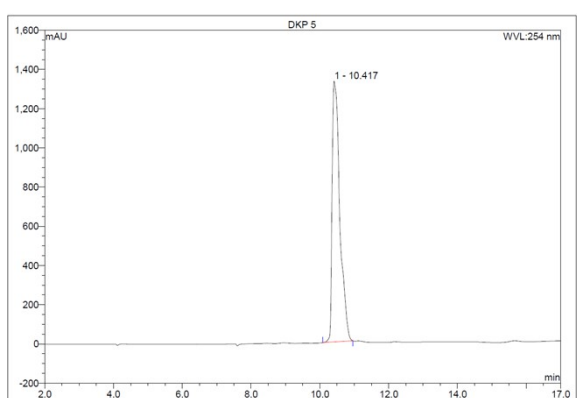

| No.           | Ret.Time<br>min | Peak Name | Height<br>mAU | Area<br>mAU*min | Rel.Area<br>% | Amount | Type |
|---------------|-----------------|-----------|---------------|-----------------|---------------|--------|------|
| 1             | 10.42           | n.a.      | 1330.950      | 344.342         | 100.00        | n.a.   | BMB* |
| <b>Total:</b> |                 |           | 1330.950      | 344.342         | 100.00        | 0.000  |      |

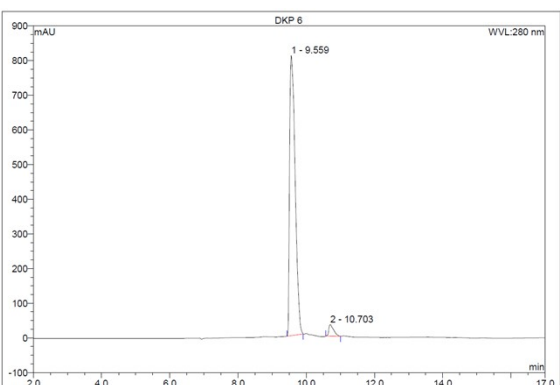

| No.           | Ret.Time<br>min | Peak Name | Height<br>mAU | Area<br>mAU*min | Rel.Area<br>% | Amount | Type |
|---------------|-----------------|-----------|---------------|-----------------|---------------|--------|------|
| 1             | 9.56            | n.a.      | 808.128       | 152.951         | 96.53         | n.a.   | BMB* |
| 2             | 10.70           | n.a.      | 33.266        | 5.500           | 3.47          | n.a.   | BMB* |
| <b>Total:</b> |                 |           | 841.394       | 158.451         | 100.00        | 0.000  |      |

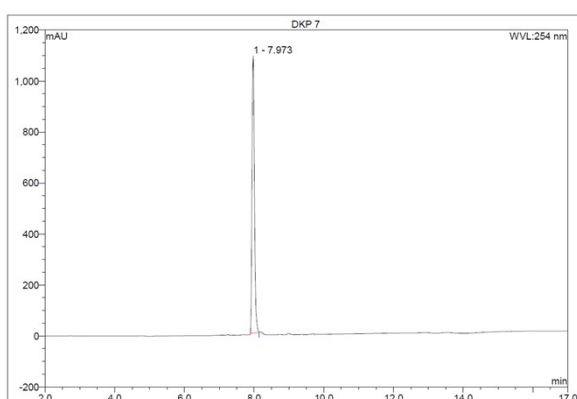

| No.           | Ret.Time<br>min | Peak Name | Height<br>mAU | Area<br>mAU*min | Rel.Area<br>% | Amount | Type |
|---------------|-----------------|-----------|---------------|-----------------|---------------|--------|------|
| 1             | 7.97            | n.a.      | 1088.240      | 87.260          | 100.00        | n.a.   | BMB* |
| <b>Total:</b> |                 |           | 1088.240      | 87.260          | 100.00        | 0.000  |      |

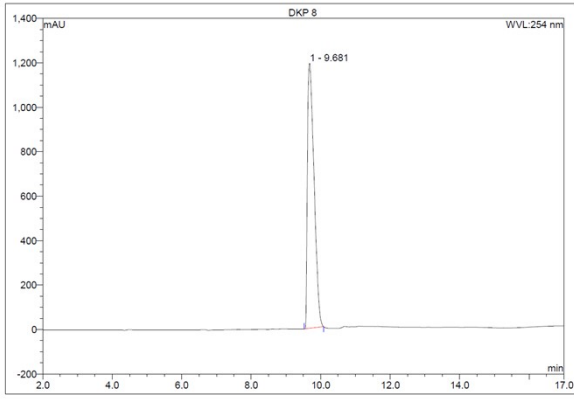

| No.           | Ret.Time min | Peak Name | Height mAU | Area mAU*min | Rel.Area % | Amount | Type |
|---------------|--------------|-----------|------------|--------------|------------|--------|------|
| 1             | 9.68         | n.a.      | 1192.724   | 263.461      | 100.00     | n.a.   | BMB* |
| <b>Total:</b> |              |           | 1192.724   | 263.461      | 100.00     | 0.000  |      |

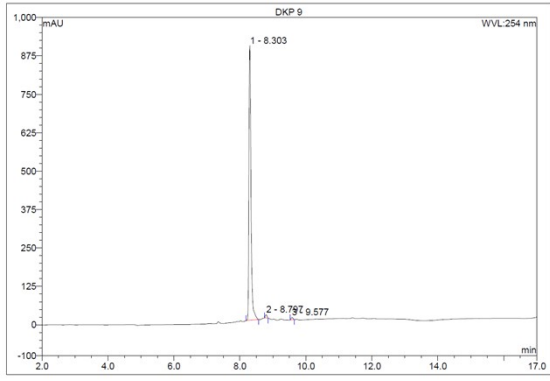

| No.           | Ret.Time min | Peak Name | Height mAU | Area mAU*min | Rel.Area % | Amount | Type |
|---------------|--------------|-----------|------------|--------------|------------|--------|------|
| 1             | 8.30         | n.a.      | 893.885    | 64.242       | 98.34      | n.a.   | BMB* |
| 2             | 8.80         | n.a.      | 10.517     | 0.630        | 0.96       | n.a.   | BMB* |
| 3             | 9.58         | n.a.      | 7.512      | 0.455        | 0.70       | n.a.   | BMB* |
| <b>Total:</b> |              |           | 911.914    | 65.327       | 100.00     | 0.000  |      |

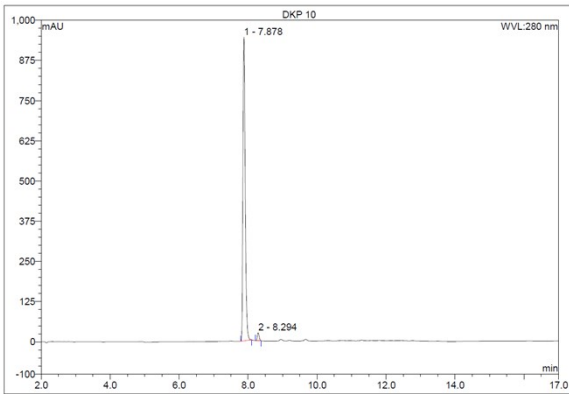

| No.           | Ret.Time min | Peak Name | Height mAU | Area mAU*min | Rel.Area % | Amount | Type |
|---------------|--------------|-----------|------------|--------------|------------|--------|------|
| 1             | 7.88         | n.a.      | 944.496    | 73.051       | 98.06      | n.a.   | BMB* |
| 2             | 8.29         | n.a.      | 24.464     | 1.448        | 1.94       | n.a.   | BMB* |
| <b>Total:</b> |              |           | 968.961    | 74.499       | 100.00     | 0.000  |      |
